# Supplementary material for: Intestinal GPDH-1 regulates high glucose diet induced lifespan extension in aged worms
Source: PeerJ. 2023 Aug 30;11:e15845. doi: 10.7717/peerj.15845 (PMC10474827; doi:10.7717/peerj.15845)
Supplement: Supplemental Information 1 [file peerj-11-15845-s001.xls]

## Sheet: Fig.1A
days	N2	HGD1	HGD5
8		1
8		1
8		1
10	1	1
10	1	1
10	1	1
10	1	1
10		1
10		1
10		1
10		1
12	1	1	1
12	1	1
12	1	1
12	1	1
12	1	1
12	1	1
12	1	1	1
12	1	1	1
12	1	1
12	1	1
12		1
12		1
12		1
12		1
14	1	1	1
14	1	1	1
14	1	1
14	1	1
14	1
14	1
14	1
14	1
14
14	1
14	1
14
14
14
14
16
16
16
16
16
16
16	1	1	1
16	1	1	1
16	1	1	1
16	1	1	1
16	1	1	1
16	1	1	1
16	1	1	1
16	1	1	1
18	1	1	1
18	1	1	1
18	1	1	1
18	1	1	1
18	1	1	1
18	1	1	1
18	1	1	1
18	1	1	1
18	1	1	1
18	1	1	1
18		1	1
18		1	1
18	1	1	1
18	1	1	1
18	1	1	1
18	1	1	1
18	1	1	1
18	1	1	1
18	1	1	1
18	1	1	1
18	1	1	1
18		1	1
20		1	1
20		1	1
20		1	1
20		1	1
20		1	1
20	1	1	1
20	1	1	1
20	1	1	1
20	1	1	1
20	1	1
20	1	1
20		1
22
22
22	1	1	1
22	1	1	1
22	1		1
22	1		1
22	1		1
22	1		1
22	1		1
22	1	1	1
22		1	1
24	1	1	1
24	1		1
24	1		1
24	1	1	1
24			1
24			1
24			1
24	1		1
24	1		1
24	1	1	1
24	1		1
24	1		1
26	1		1
26	1		1
26	1		1
26	1		1
26	1		1
28	1		1
28			1

## Sheet: Fig.1B
days	SKN-1	HGD1	HGD5
6	1	1
6	1	1
6	1	1
6	1	1
6	1	1
6	1
6
6
6
8
8
8
8	1
8	1
8	1		1
8	1		1
8	1
8	1	1
8	1	1
8	1	1
10	1	1	1
10	1	1	1
10	1	1	1
10	1	1	1
10	1	1	1
10	1	1	1
10	1	1
10	1	1
10	1	1
10	1	1
10	1	1
10	1	1
10	1	1
10	1	1
10	1	1
10	1	1
10		1
10		1
10
10
12	1
12	1
12	1		1
12	1		1
12	1		1
12	1	1	1
12	1	1	1
12	1	1	1
12	1	1	1
12	1	1
12	1	1
12	1	1
12	1	1
12	1	1
14	1	1	1
14	1	1	1
14	1	1	1
14	1	1
14	1	1
14	1	1
14	1	1
14	1	1
14	1	1
14	1	1
14	1	1
14	1	1
14	1	1
14	1	1
14	1	1
16	1
16	1
16	1
16	1
16	1	1
16	1	1	1
16	1	1	1
16	1	1	1
16	1	1	1
16	1	1	1
16	1		1
16	1		1
16	1		1
16	1		1
18			1
18			1
18			1
18			1
18			1
18			1
18	1	1	1
18	1	1	1
18	1	1	1
18	1	1	1
18	1	1	1
18	1		1
18	1		1
18	1	1	1
18	1	1	1
18	1	1	1
18	1	1	1
18	1	1	1
18	1	1	1
18	1		1
18	1		1
18	1
20	1	1
20	1
20
20	1
20	1	1
20	1	1
20
20
20
20
20
20
20
20
22
22
22
22
22
22
22
22
22			1
22			1
22			1
24			1
24			1

## Sheet: Fig.1C
days	N2	PQ	HGD5	HGD5+PQ
6
6
6
6
6
8
8
8	1
8	1
8
8
8
8
10
10
10
10
10
10			1	1
10			1	1
10				1
10		1
10		1
10
10
10	1		1	1
10	1		1	1
10	1		1	1
10	1
10
10
10
10
12		1	1	1
12		1	1	1
12			1	1
12	1		1	1
12	1		1	1
12	1		1	1
12	1		1	1
12	1
12	1
12	1
12	1
12	1
12	1
12	1
14	1
14	1
14	1
14	1
14	1		1	1
14	1		1
14	1		1
14	1	1	1
14	1	1	1
14	1	1	1
14	1	1	1
14		1
14		1
14		1
14
16	1
16	1			1
16	1			1
16	1	1	1	1
16	1	1	1	1
16	1	1	1	1
16	1	1	1	1
16	1	1	1	1
16	1	1	1	1
16	1	1	1	1
16	1	1	1
16	1	1	1
16	1	1	1
16	1	1	1
18	1	1		1
18	1	1		1
18	1	1		1
18	1	1		1
18	1	1	1	1
18	1	1	1	1
18	1	1	1	1
18	1	1	1	1
18	1	1	1	1
18	1	1	1	1
18	1	1	1	1
18	1	1	1	1
18	1	1	1	1
18	1		1	1
18	1		1	1
18	1		1	1
18	1			1
18	1			1
18			1
18			1
18			1
18			1	1
20		1	1	1
20		1	1	1
20		1	1	1
20		1	1	1
20	1	1	1	1
20	1		1	1
20	1		1	1
20	1	1	1	1
20	1	1	1	1
20	1	1	1	1
20	1	1	1	1
20		1	1	1
22	1	1	1	1
22	1	1		1
22	1	1		1
22	1	1		1
22	1	1		1
22	1	1		1
22	1	1	1	1
22	1		1
22	1		1
22			1
22			1	1
24	1		1	1
24	1	1	1	1
24	1	1	1	1
24	1	1	1	1
24	1	1	1	1
24	1	1	1	1
24	1	1	1	1
24	1	1	1	1
24	1	1	1	1
24	1			1
24
24
26	1	1	1	1
26	1	1	1	1
26	1	1	1	1
26		1		1
26		1	1	1
28		1	1	1
28		1	1	1
28		1	1	1
28		1	1	1
28		1
30		1	1	1
30		1	1
30		1
30		1
32		1
32		1
34		1
34		1
34		1
34		1
34		1
36		1
36		1

## Sheet: Fig.1D
days	N2	PQ	HGD5	HGD5+PQ
6
6
6
6
6
8
8
8	1
8	1
8
8
8
8
10
10
10
10
10
10			1	1
10			1	1
10				1
10		1
10		1
10
10
10	1		1	1
10	1		1	1
10	1		1	1
10	1
10
10
10
10
12		1	1	1
12		1	1	1
12			1	1
12	1		1	1
12	1		1	1
12	1		1	1
12	1		1	1
12	1
12	1
12	1
12	1
12	1
12	1
12	1
14	1
14	1
14	1
14	1
14	1		1	1
14	1		1
14	1		1
14	1	1	1
14	1	1	1
14	1	1	1
14	1	1	1
14		1
14		1
14		1
14
16	1
16	1			1
16	1			1
16	1	1	1	1
16	1	1	1	1
16	1	1	1	1
16	1	1	1	1
16	1	1	1	1
16	1	1	1	1
16	1	1	1	1
16	1	1	1
16	1	1	1
16	1	1	1
16	1	1	1
18	1	1		1
18	1	1		1
18	1	1		1
18	1	1		1
18	1	1	1	1
18	1	1	1	1
18	1	1	1	1
18	1	1	1	1
18	1	1	1	1
18	1	1	1	1
18	1	1	1	1
18	1	1	1	1
18	1	1	1	1
18	1		1	1
18	1		1	1
18	1		1	1
18	1			1
18	1			1
18			1
18			1
18			1
18			1	1
20		1	1	1
20		1	1	1
20		1	1	1
20		1	1	1
20	1	1	1	1
20	1		1	1
20	1		1	1
20	1	1	1	1
20	1	1	1	1
20	1	1	1	1
20	1	1	1	1
20		1	1	1
22	1	1	1	1
22	1	1		1
22	1	1		1
22	1	1		1
22	1	1		1
22	1	1		1
22	1	1	1	1
22	1		1
22	1		1
22			1
22			1	1
24	1		1	1
24	1	1	1	1
24	1	1	1	1
24	1	1	1	1
24	1	1	1	1
24	1	1	1	1
24	1	1	1	1
24	1	1	1	1
24	1	1	1	1
24	1			1
24
24
26	1	1	1	1
26	1	1	1	1
26	1	1	1	1
26		1		1
26		1	1	1
28		1	1	1
28		1	1	1
28		1	1	1
28		1	1	1
28		1
30		1	1	1
30		1	1
30		1
30		1
32		1
32		1
34		1
34		1
34		1
34		1
34		1
36		1
36		1

## Sheet: Fig.3B
days	N2	N2-2
6	1
6
6
6
6
8
8	1
8	1	1
8	1
8
8
8
8
10	1
10	1
10	1
10	1
10	1
10
10
10
10
10
10
10
10
10
10		1
10	1	1
10
10
10
10
12
12
12
12	1	1
12	1	1
12	1	1
12	1	1
12	1	1
12	1	1
12	1	1
12	1	1
12	1	1
12	1	1
12		1
14	1	1
14	1	1
14	1	1
14	1	1
14	1	1
14	1	1
14	1	1
14	1
14	1
14	1
14	1
14	1
14
14
14
16	1
16	1
16	1
16	1	1
16	1	1
16	1	1
16	1	1
16	1	1
16	1	1
16	1	1
16	1	1
16	1	1
16	1	1
16	1	1
18	1	1
18	1	1
18	1	1
18	1	1
18	1	1
18	1	1
18	1	1
18	1	1
18	1	1
18	1	1
18	1	1
18	1	1
18	1	1
18	1	1
18	1	1
18	1	1
18		1
18		1
18		1
18		1
18
18
20		1
20		1
20		1
20		1
20	1	1
20	1	1
20	1	1
20	1	1
20	1	1
20	1	1
20	1	1
20		1
22	1	1
22	1	1
22	1	1
22	1	1
22	1	1
22	1	1
22	1	1
22		1
22		1
22		1
22		1
24	1	1
24	1	1
24	1	1
24	1	1
24	1	1
24	1	1
24	1	1
24	1	1
24		1
24		1
24		1
24
26	1	1
26	1	1
26		1
26		1
28	1	1
28		1
28
28

## Sheet: Fig.3D
days	col-92	col-92+HGD5
6
6
6
6	1
6	1	1
6
8
8
8	1
8	1
8	1
8	1
8	1	1
8	1	1
10
10
10
10
10	1
10	1
10	1	1
10	1
10	1
10	1
10	1
10	1	1
10	1	1
10		1
10
10
10
10
10
10
12	1	1
12	1	1
12	1	1
12	1	1
12	1
12	1
12
12	1
12	1
12	1
12
12
12
12
14
14
14
14
14		1
14		1
14	1	1
14	1	1
14	1	1
14	1	1
14	1
14	1
14	1
14	1
14
16
16		1
16	1	1
16	1	1
16	1	1
16	1	1
16	1	1
16	1	1
16	1	1
16	1	1
16	1	1
16		1
16	1	1
16	1	1
18	1	1
18	1	1
18	1	1
18	1	1
18	1	1
18	1	1
18	1	1
18	1	1
18	1	1
18		1
18		1
18		1
18		1
18		1
18		1
18		1
18		1
18		1
18		1
18		1
18	1	1
18	1	1
20	1	1
20	1	1
20	1	1
20	1	1
20		1
20		1
20	1	1
20	1	1
20	1	1
20	1	1
20	1	1
20	1	1
22	1	1
22	1	1
22	1	1
22	1	1
22	1	1
22	1	1
22	1	1
22	1	1
22	1	1
22		1
22		1
22		1
22		1
24		1
24	1	1
24	1	1
24	1	1
24	1	1
24	1	1
26		1
26

## Sheet: Fig.3F
days	gpdh-1	gpdh-1+HGD5
6
6
6
6
6	1
8
8
8	1	1
8	1	1
8
8
8
8
10
10
10
10
10
10		1
10		1
10
10	1
10	1
10	1
10
10		1
10		1
10		1
10
10
10
10
10
12	1	1
12	1	1
12	1	1
12	1	1
12	1	1
12	1	1
12	1	1
12	1	1
12
12
12
12
12
12
14
14
14
14
14		1
14		1
14	1	1
14	1	1
14	1	1
14	1	1
14	1	1
14	1	1
14	1
14	1
14	1
16
16
16
16	1	1
16	1	1
16	1	1
16	1	1
16	1	1
16	1	1
16	1	1
16	1	1
16	1	1
16	1	1
16	1	1
18	1	1
18	1
18	1
18	1
18	1	1
18	1	1
18	1	1
18	1	1
18	1	1
18	1	1
18	1	1
18	1	1
18	1	1
18	1	1
18	1	1
18	1	1
18	1
18	1
18		1
18		1
18		1
18	1	1
20	1	1
20	1	1
20	1	1
20	1	1
20	1	1
20	1	1
20	1	1
20	1	1
20	1	1
20	1	1
20	1	1
20	1	1
22	1	1
22	1	1
22	1
22	1
22	1
22	1
22	1	1
22	1	1
22	1	1
22		1
22		1
24	1	1

## Sheet: Fig.4A
days	neuronalgpdh-1RNAi	HGD5
6	1
8	1
8	1
8		1
10	1	1
10	1	1
10	1
10	1
10	1
12	1	1
12	1	1
12	1	1
12	1	1
12	1	1
12	1	1
12	1	1
12	1	1
12	1	1
12	1
12	1
14	1	1
14	1	1
14	1	1
14	1	1
14	1	1
14	1	1
14	1	1
14	1
14	1
16		1
16		1
16	1	1
16	1	1
16	1	1
16	1	1
16	1	1
16	1	1
16	1	1
16	1	1
16	1	1
16	1	1
16	1	1
16	1
18	1	1
18	1	1
18	1	1
18	1	1
18	1	1
18	1	1
18	1	1
18	1	1
18	1	1
18	1	1
18	1	1
18	1	1
18	1	1
18	1
18	1
18	1
20	1	1
20	1	1
20	1	1
20	1	1
20	1	1
20		1
20		1
20		1
20		1
20		1
20		1
20		1
22	1	1
22	1	1
22	1	1
22	1	1
22	1	1
22	1	1
22		1
22		1
22		1
22		1
22		1
24	1	1
24	1	1
24	1	1
24	1	1
24	1	1
24	1	1
24	1	1
24	1	1
24		1
24		1
26	1	1
26		1
26		1
26		1

## Sheet: Fig.4B
days	intestinalgpdh-1RNAi	HGD5
6	1
6	1
6	1	1
8		1
8		1
8	1	1
8	1	1
10	1	1
10	1	1
10	1	1
10	1	1
10	1	1
10	1	1
10	1	1
10	1	1
10		1
12	1	1
12	1	1
12	1	1
12	1	1
12	1	1
12	1	1
12	1	1
12	1	1
12		1
12		1
14	1	1
14	1	1
14	1	1
14	1	1
14	1	1
14	1	1
14	1	1
14	1	1
14	1	1
14	1	1
14	1	1
14		1
16	1	1
16	1	1
16	1	1
16	1	1
16	1	1
16	1	1
16	1	1
16	1	1
16	1	1
16	1	1
16	1	1
16		1
16		1
16		1
18	1	1
18	1	1
18	1	1
18	1	1
18	1	1
18	1	1
18	1	1
18	1	1
18	1	1
18	1	1
18	1	1
18	1	1
18	1	1
20	1	1
20	1	1
20	1	1
20	1	1
20	1	1
20	1	1
20	1	1
20	1	1
20	1	1
20	1	1
20	1	1
20	1	1
22	1	1
22	1	1
22	1	1
22	1	1
22	1	1
22	1	1
22	1	1
22	1	1
22	1
24	1	1
24	1	1
24	1	1
24	1	1
24	1	1
26	1	1
26		1
26		1
