# Supplementary material for: Intestinal GPDH-1 regulates high glucose diet induced lifespan extension in aged worms
Source: PeerJ. 2023 Aug 30;11:e15845. doi: 10.7717/peerj.15845 (PMC10474827; doi:10.7717/peerj.15845)
Supplement: Supplemental Information 2 [file peerj-11-15845-s002.xls]

## Sheet: Fig.1A
N2 Vs HGD1				N2	HGD1
Log-rank (Mantel-Cox) test			Number of rows	118	118
Chi square	8.858		# of blank lines	38	40
df	1		# rows with impossible data	0	0
P value	0.0029		# censored subjects	0	0
P value summary	**		# deaths/events	80	78
Are the survival curves sig different?	Yes
			Median survival	18	18
N2 Vs HGD5				N2	HGD5
Log-rank (Mantel-Cox) test			Number of rows	118	118
Chi square	4.454		# of blank lines	38	46
df	1		# rows with impossible data	0	0
P value	0.0348		# censored subjects	0	0
P value summary	*		# deaths/events	80	72
Are the survival curves sig different?	Yes
			Median survival	18	20
HGD1 vs HGD5				HGD1	HGD5
Log-rank (Mantel-Cox) test			Number of rows	118	118
Chi square	28.19		# of blank lines	40	46
df	1		# rows with impossible data	0	0
P value	<0.0001		# censored subjects	0	0
P value summary	****		# deaths/events	78	72
Are the survival curves sig different?	Yes
			Median survival	18	20

## Sheet: Fig.1B
skn-1 Vs HGD1				SKN-1	HGD1
Log-rank (Mantel-Cox) test			Number of rows	132	132
Chi square	0.3558		# of blank lines	38	62
df	1		# rows with impossible data	0	0
P value	0.5508		# censored subjects	0	0
P value summary	ns		# deaths/events	94	70
Are the survival curves sig different?	No
			Median survival	14	13
skn-1 Vs HGD5				SKN-1	HGD5
Log-rank (Mantel-Cox) test			Number of rows	132	132
Chi square	13.62		# of blank lines	38	79
df	1		# rows with impossible data	0	0
P value	0.0002		# censored subjects	0	0
P value summary	***		# deaths/events	94	53
Are the survival curves sig different?	Yes
			Median survival	14	16
HGD1 vs HGD5				HGD1	HGD5
Log-rank (Mantel-Cox) test			Number of rows	132	132
Chi square	15.53		# of blank lines	62	79
df	1		# rows with impossible data	0	0
P value	<0.0001		# censored subjects	0	0
P value summary	****		# deaths/events	70	53
Are the survival curves sig different?	Yes
			Median survival	13	16

## Sheet: Fig.1C
N2 vs PQ				N2	PQ
Log-rank (Mantel-Cox) test			Number of rows	151	151
Chi square	13.66		# of blank lines	66	69
df	1		# rows with impossible data	0	0
P value	0.0002		# censored subjects	0	0
P value summary	***		# deaths/events	85	82
Are the survival curves sig different?	Yes
			Median survival	18	18
N2 Vs HGD1				N2	HGD1
Log-rank (Mantel-Cox) test			Number of rows	151	151
Chi square	18.61		# of blank lines	66	67
df	1		# rows with impossible data	0	0
P value	<0.0001		# censored subjects	0	0
P value summary	****		# deaths/events	85	84
Are the survival curves sig different?	Yes
			Median survival	18	16
HGD1 vs HGD1+PQ				HGD1	HGD1+PQ
Log-rank (Mantel-Cox) test			Number of rows	151	151
Chi square	0.009774		# of blank lines	67	71
df	1		# rows with impossible data	0	0
P value	0.9212		# censored subjects	0	0
P value summary	ns		# deaths/events	84	80
Are the survival curves sig different?	No
			Median survival	16	14
PQ vs HGD1+PQ				PQ	HGD1+PQ
Log-rank (Mantel-Cox) test			Number of rows	151	151
Chi square	46.63		# of blank lines	69	71
df	1		# rows with impossible data	0	0
P value	<0.0001		# censored subjects	0	0
P value summary	****		# deaths/events	82	80
Are the survival curves sig different?	Yes
			Median survival	18	14

## Sheet: Fig.1D 
N2 vs PQ				N2	PQ
Log-rank (Mantel-Cox) test			Number of rows	156	156
Chi square	24.39		# of blank lines	67	73
df	1		# rows with impossible data	0	0
P value	<0.0001		# censored subjects	0	0
P value summary	****		# deaths/events	89	83
Are the survival curves sig different?	Yes
			Median survival	18	20
N2 Vs HGD5				N2	HGD5
Log-rank (Mantel-Cox) test			Number of rows	156	156
Chi square	4.935		# of blank lines	67	73
df	1		# rows with impossible data	0	0
P value	0.0263		# censored subjects	0	0
P value summary	*		# deaths/events	89	83
Are the survival curves sig different?	Yes
			Median survival	18	18
HGD5 vs HGD5+PQ				HGD5	HGD5+PQ
Log-rank (Mantel-Cox) test			Number of rows	156	156
Chi square	0.1113		# of blank lines	73	74
df	1		# rows with impossible data	0	0
P value	0.7386		# censored subjects	0	0
P value summary	ns		# deaths/events	83	82
Are the survival curves sig different?	No
			Median survival	18	18
PQ vs HGD5+PQ				PQ	HGD5+PQ
Log-rank (Mantel-Cox) test			Number of rows	156	156
Chi square	8.603		# of blank lines	73	74
df	1		# rows with impossible data	0	0
P value	0.0034		# censored subjects	0	0
P value summary	**		# deaths/events	83	82
Are the survival curves sig different?	Yes
			Median survival	20	18

## Sheet: Fig.3B
N2-ND vs N2-HGD5				N2-ND	N2-HGD5
Log-rank (Mantel-Cox) test			Number of rows	141	141
Chi square	4.662		# of blank lines	54	49
df	1		# rows with impossible data	0	0
P value	0.0308		# censored subjects	0	0
P value summary	*		# deaths/events	87	92
Are the survival curves sig different?	Yes
			Median survival	16	18

## Sheet: Fig.3D
col-92 vs col-92+HGD5				col-92	col-92+HGD5
Log-rank (Mantel-Cox) test			Number of rows	132	132
Chi square	4.457		# of blank lines	52	48
df	1		# rows with impossible data	0	0
P value	0.0348		# censored subjects	0	0
P value summary	*		# deaths/events	80	84
Are the survival curves sig different?	Yes
			Median survival	16	18

## Sheet: Fig.3F
gpdh-1 vs gpdh-1+HGD5				col-92	col-92+HGD5
Log-rank (Mantel-Cox) test			Number of rows	132	132
Chi square	0.117		# of blank lines	52	48
df	1		# rows with impossible data	0	0
P value	0.7323		# censored subjects	0	0
P value summary	ns		# deaths/events	80	84
Are the survival curves sig different?	No
			Median survival	16	18

## Sheet: Fig.4A
neuronal gpdh-1 RNAi vs HGD5				neuronalgpdh-1RNAi	HGD5
Log-rank (Mantel-Cox) test			Number of rows	129	129
Chi square	4.637		# of blank lines	53	47
df	1		# rows with impossible data	0	0
P value	0.0313		# censored subjects	0	0
P value summary	*		# deaths/events	76	82
Are the survival curves sig different?	Yes
			Median survival	16	18

## Sheet: Fig.4B
intestinal gpdh-1 RNAi vs HGD5				intestinal gpdh-1 RNAi	HGD5
Log-rank (Mantel-Cox) test			Number of rows	94	94
Chi square	0.005158		# of blank lines	11	3
df	1		# rows with impossible data	0	0
P value	0.9427		# censored subjects	0	0
P value summary	ns		# deaths/events	83	91
Are the survival curves sig different?	No
			Median survival	16	16
