# Supplementary material for: Intestinal GPDH-1 regulates high glucose diet induced lifespan extension in aged worms
Source: PeerJ. 2023 Aug 30;11:e15845. doi: 10.7717/peerj.15845 (PMC10474827; doi:10.7717/peerj.15845)
Supplement: Supplemental Information 3 [file peerj-11-15845-s003.xls]

## Sheet: down regulation
Term Expected Observed Enrichment Fold Change P value Q value
intestine WBbt:0005772 2.9 10 3.5 0.00011 0.047								vexcretory duct cell		0.00011	-3.95861	-9.89652
excretory duct cell WBbt:0004540 0.02 1 50 0.00019 0.047										0.00019	-3.72125	-9.30312
												0
												0
Term Expected Observed Enrichment Fold Change P value Q value												0
positive regulation of programmed cell death GO:0043068 0.022 1 45 0.00023 0.071										0.00023	-3.63827	-9.09568
Your Input	WormBase Gene ID	Public Name	Species	Biotype	Sequence Name	Other Name	Transcript	Operon	WormPep	Protein Domain	UniProt	Reference UniProt ID	TreeFam	RefSeq_mRNA	RefSeq_protein	Genetic Map Position	RNAi Clone	RNAi Phenotype Observed	Allele Phenotype Observed	Coding_exon Non_silent Allele	Interacting Gene	Expr_pattern Tissue	Genomic Study Tissue	Expr_pattern LifeStage	Genomic Study LifeStage	Disease Info	Human Ortholog	Gene Ontology Association	Concise Description	Automated Description	Expression Cluster Summary	Reference
WBGene00012634	WBGene00012634	Y38H6C.23	Caenorhabditis elegans	protein_coding_gene	Y38H6C.23	CELE_Y38H6C.23	Y38H6C.23.1	N.A.	N.A.	N.A.	Q7YWQ9	Q7YWQ9	TF319818	NM_001029055.5	NP_001024226.1	V 25.012119	N.A.	N.A.	N.A.	gk267333|Substitution|Missense, gk551317|Substitution|Missense, gk656345|Substitution|Nonsense, gk938260|Substitution|Missense	N.A.	N.A.	hermaphrodite-specific anatomical entity, intestine, OLL, PVD	N.A.	1-cell embryo Ce, 1-day post-L4 adult hermaphrodite Ce, 12-days post-L4 adult hermaphrodite Ce, 2-days post-L4 adult hermaphrodite Ce, 3-days post-L4 adult hermaphrodite Ce, 4-days post-L4 adult hermaphrodite Ce, 5-days post-L4 adult hermaphrodite Ce, adult Ce, adult hermaphrodite Ce, all stages Ce, blastula embryo Ce, dauer larva Ce, embryo Ce, L1 larva Ce, L2 larva Ce, L3 larva Ce, L4 larva Ce,…	N.A.	N.A.	N.A.	N.A.	Enriched in OLL\; PVD\; and intestine based on tiling array and RNA-seq studies. Is affected by several genes including daf-16\; daf-2\; and skn-1 based on RNA-seq\; microarray\; and studies. Is affected by eight chemicals including 1-methylnicotinamide\; D-glucose\; and Alovudine based on RNA-seq and microarray studies.	Enriched in PVD, OLL, hermaphrodite-specific anatomical entity and intestine according to tiling array and RNA-seq. Affected by wdr-23, nhr-8, eat-2, ash-2, npr-1, jmjd-3.1, jmjd-1.2, daf-2, rbr-2, mir-60, cec-4, skn-1, dpy-21, mir-34, daf-12, daf-16, glh-4, glh-1, pgl-1, pgl-3, hrde-1, morc-1, alg-1, lin-22, cox-5B, his-3, elt-7, elt-2, ins-11, isp-1, nuo-6, hpl-2, atfs-1, hif-1, nhl-2, aak-1, a…	N.A.
WBGene00018393	WBGene00018393	msra-1	Caenorhabditis elegans	protein_coding_gene	F43E2.5	CELE_F43E2.5	F43E2.5.1	N.A.	CE07241	CE07241|HMMPANTHER:PTHR42799|HMMPANTHER:PTHR42799:SF13|TIGRFAM:TIGR00401|PFAM:PF01625|SUPERFAMILY:SSF55068|INTERPRO:IPR002569|INTERPRO:IPR036509|Active_site	O02089	O02089	TF353883	NM_063139.10	NP_495540.1	II 0.50 +/- 0.00	mv_F43E2.5, cenix:210-b7, sjj_F43E2.5|II-5H15	N.A.	N.A.	gk779584|Substitution|Missense, gk854750|Substitution|Missense	glh-1|Physical, pid-3|Physical, pik-1|Physical, sip-1|Physical, wago-1|Physical	hypodermis, intestine, neuron	AFD, ASER, hypodermis, intestine, muscle cell, PLM, sensory neuron	adult Ce, fully-elongated embryo Ce, L1 larva Ce, L2 larva Ce, L3 larva Ce, L4 larva Ce	1-day post-L4 adult hermaphrodite Ce, 10-days post-L4 adult hermaphrodite Ce, 2-days post-L4 adult hermaphrodite Ce, 3-days post-L4 adult hermaphrodite Ce, 3-fold embryo Ce, 4-days post-L4 adult hermaphrodite Ce, 5-days post-L4 adult hermaphrodite Ce, 6-days post-L4 adult hermaphrodite Ce, 7-10 days post-L4 adult hermaphrodite Ce, adult Ce, adult hermaphrodite Ce, all stages Ce, blastula embryo C…	N.A.	HGNC:7377|OrthoInspector;EnsEMBL-Compara;OMA;Hieranoid;PhylomeDB;Inparanoid;Roundup	"cellular response to oxidative stress", "cytoplasm", "L-methionine-(S)-S-oxide reductase activity", "L-methionine:thioredoxin-disulfide S-oxidoreductase activity", "obsolete oxidation-reduction process", "oxidoreductase activity", "peptide-methionine (S)-S-oxide reductase activity"	msra-1 encodes a methionine sulfoxide-S-reductase (MsrA) with experimentally confirmed activity.	Enables L-methionine:thioredoxin-disulfide S-oxidoreductase activity and peptide-methionine (S)-S-oxide reductase activity. Involved in obsolete oxidation-reduction process. Predicted to be located in cytoplasm. Expressed in hypodermis and neurons. Is an ortholog of human MSRA (methionine sulfoxide reductase A).	Enriched in hypodermis, muscle cell, AFD, ASER, PLM, intestine and sensory neuron according to tiling array, RNA-seq and microarray. Affected by cyc-1, cid-1, nhr-49, oatr-1, spe-44, wdr-23, daf-2, prg-1, fbf-1, clk-1, tdp-1, mdt-15, swsn-2.2, rsks-1, hsf-1, mes-6, skn-1, skr-2, skr-1, dpy-21, mir-34, glh-4, glh-1, pgl-1, pgl-3, hrde-1, morc-1, alg-1, sma-2, sma-4, hsp-90, lin-22, mir-71, nuo-6, …	WBPaper00024679|pmid15639227, WBPaper00032037|pmid18648821, WBPaper00033823|pmid N.A., WBPaper00035203|pmid19747232, WBPaper00037451|pmid N.A., WBPaper00038491|pmid21647448, WBPaper00045471|pmid24988428, WBPaper00055090|pmid30120140, WBPaper00055754|pmid30456853, WBPaper00060431|pmid33016879
WBGene00012583	WBGene00012583	clec-4	Caenorhabditis elegans	protein_coding_gene	Y38E10A.5	CELE_Y38E10A.5	Y38E10A.5.1	N.A.	CE28701	CE28701|HMMPANTHER:PTHR22991|HMMPANTHER:PTHR22991:SF41|PFSCAN:PS50041|PFSCAN:PS01180|SCANPROSITE:PS00615|SMART:SM00034|SMART:SM00042|PFAM:PF00431|PFAM:PF00059|SUPERFAMILY:SSF49854|SUPERFAMILY:SSF56436|INTERPRO:IPR000859|INTERPRO:IPR001304|INTERPRO:IPR016186|INTERPRO:IPR016187|INTERPRO:IPR035914	Q9NAK5	Q9NAK5	TF351663	NM_064287.4	NP_496688.1	II 10.41 +/- 0.02	cenix:65-d10, mv_Y38E10A.5, sjj_Y38E10A.e|II-8M16	motor neuron morphology variant, synapse density variant, transgene subcellular localization variant	bacterial load in gut variant, feeding behavior variant, pathogen resistance increased	gk157561|Substitution|Missense, gk157562|Substitution|Missense, gk157563|Substitution|Missense, gk393637|Substitution|Missense, gk505344|Substitution|Missense, gk623638|Substitution|Missense, gk776371|Substitution|Missense, h4653|Substitution|Missense	N.A.	amphid neuron, int1DL, int1DR, int1VL, int1VR, intestine	intestine, OLL, pharyngeal muscle cell, PVD	adult Ce, all stages Ce, L4 larva Ce, larva Ce	1-day post-L4 adult hermaphrodite Ce, 10-days post-L4 adult hermaphrodite Ce, 2-days post-L4 adult hermaphrodite Ce, 3-days post-L4 adult hermaphrodite Ce, 4-cell embryo Ce, 4-days post-L4 adult hermaphrodite Ce, 5-days post-L4 adult hermaphrodite Ce, 6-days post-L4 adult hermaphrodite Ce, 7-10 days post-L4 adult hermaphrodite Ce, adult Ce, adult hermaphrodite Ce, all stages Ce, blastula embryo C…	N.A.	N.A.	"carbohydrate binding"	clec-4 encodes a C-type lectin\; clec-4 expression is upregulated in response to stressors, including pathogens and ionizing radiation.	Predicted to enable carbohydrate binding activity.	Enriched in PVD, OLL, intestine and pharyngeal muscle cell according to microarray, tiling array and RNA-seq. Affected by daf-12, cyc-1, age-1, hpl-2, atfs-1, spg-7, smg-2, smgl-1, let-7, gld-1, bar-1, prg-1, clk-1, wrn-1, aak-2, crtc-1, daf-2, fshr-1, mdt-15, daf-16, swsn-2.2, npr-1, cox-5B, jmjd-3.1, jmjd-1.2, dop-1, hyl-2, hsf-1, mir-34, hrpr-1, glp-1, elli-1, glh-4, glh-1, pgl-1, pgl-3, morc-…	WBPaper00031686|pmid18406370, WBPaper00035429|pmid19879883, WBPaper00038491|pmid21647448, WBPaper00041533|pmid22967128, WBPaper00047766|pmid N.A., WBPaper00055090|pmid30120140, WBPaper00057576|pmid N.A., WBPaper00061236|pmid33793670
WBGene00011487	WBGene00011487	T05E12.6	Caenorhabditis elegans	protein_coding_gene	T05E12.6	CELE_T05E12.6	T05E12.6a.1, T05E12.6b.1	N.A.	CE50261, CE50207	CE50261|HMMPANTHER:PTHR47407|HMMPANTHER:PTHR47407:SF2|PFAM:PF02408|INTERPRO:IPR003366, CE50207|HMMPANTHER:PTHR47407|HMMPANTHER:PTHR47407:SF2|PFAM:PF02408|INTERPRO:IPR003366	O45754, A5JYX7	O45754	TF316078	NM_001129530.7, NM_074926.9	NP_001123002.2, NP_507327.3	V 12.724430	N.A.	N.A.	N.A.	gk259460|Substitution|Missense, gk259469|Substitution|Missense, gk259471|Substitution|Missense, gk332278|Substitution|Missense, gk356108|Substitution|Missense, gk467879|Substitution|Missense, gk533740|Substitution|Missense, gk556828|Substitution|Nonsense, gk775574|Substitution|Missense, gk785677|Substitution|Missense, gk888318|Substitution|Missense, gk938238|Substitution|Missense	N.A.	N.A.	DA neuron, I5 neuron, intestine, retrovesicular ganglion, SAB, VA neuron	N.A.	1-day post-L4 adult hermaphrodite Ce, 2-days post-L4 adult hermaphrodite Ce, 24-cell embryo Ce, 3-days post-L4 adult hermaphrodite Ce, 3-fold embryo Ce, 4-days post-L4 adult hermaphrodite Ce, 5-days post-L4 adult hermaphrodite Ce, 6-days post-L4 adult hermaphrodite Ce, 7-10 days post-L4 adult hermaphrodite Ce, 7-days post-L4 adult hermaphrodite Ce, 96-cell embryo Ce, adult Ce, adult hermaphrodite…	N.A.	N.A.	N.A.	N.A.	Enriched in I5 neuron\; cholinergic neurons\; intestine\; and retrovesicular ganglion based on RNA-seq and microarray studies. Is affected by several genes including daf-16\; daf-2\; and skn-1 based on microarray and RNA-seq studies. Is affected by twenty-nine chemicals including Heme\; diallyl trisulfide\; and Tunicamycin based on microarray and RNA-seq studies. Is predicted to encode a protein …	Enriched in intestine, I5 neuron, DA neuron, SAB, retrovesicular ganglion and VA neuron according to RNA-seq and microarray. Affected by daf-12, alg-1, cid-1, wdr-23, smgl-1, ubc-9, clk-1, skn-1, mdt-15, swsn-2.2, tcer-1, elt-2, npr-1, cox-5B, jmjd-3.1, jmjd-1.2, hsf-1, rbr-2, chd-3, let-418, cec-4, set-25, met-2, lin-28, dpy-21, mir-34, glh-4, glh-1, pgl-1, pgl-3, ash-2, hrde-1, emb-4, sma-2, sm…	N.A.
WBGene00000213	WBGene00000213	asm-3	Caenorhabditis elegans	protein_coding_gene	W03G1.7	CELE_W03G1.7	W03G1.7a.1, W03G1.7b.1	N.A.	CE31626, CE39794	CE31626|HMMPANTHER:PTHR10340:SF31|HMMPANTHER:PTHR10340|PFSCAN:PS50015|PIRSF:PIRSF000948|SMART:SM00741|PFAM:PF00149|SUPERFAMILY:SSF56300|SUPERFAMILY:SSF47862|INTERPRO:IPR004843|INTERPRO:IPR008139|INTERPRO:IPR011001|INTERPRO:IPR011160|INTERPRO:IPR029052|Metal_ion_binding_site, CE39794|HMMPANTHER:PTHR10340|HMMPANTHER:PTHR10340:SF31|PIRSF:PIRSF000948|PFAM:PF00149|SUPERFAMILY:SSF56300|INTERPRO:IPR0048…	Q9UAY4, G8JY85	Q9UAY4	TF313674	NM_001047531.2, NM_001047532.6	NP_001040997.1, NP_001040996.1	IV -25.85 +/- 0.01	sjj_W03G1.7|IV-1M17, cenix:116-f12, mv_W03G1.7	extended life span, paraquat resistant	N.A.	gk192244|Substitution|Missense, gk192245|Substitution|Missense, gk770545|Substitution|Missense, gk790215|Substitution|Missense, gk938019|Substitution|Missense	N.A.	N.A.	intestine	N.A.	1-cell embryo Ce, 1-day post-L4 adult hermaphrodite Ce, 2-days post-L4 adult hermaphrodite Ce, 24-cell embryo Ce, 3-days post-L4 adult hermaphrodite Ce, 4-cell embryo Ce, 4-days post-L4 adult hermaphrodite Ce, 5-days post-L4 adult hermaphrodite Ce, 6-days post-L4 adult hermaphrodite Ce, 7-10 days post-L4 adult hermaphrodite Ce, 96-cell embryo Ce, adult Ce, adult hermaphrodite Ce, blastula embryo …	Niemann-Pick disease type A|By Orthology, Niemann-Pick disease type B|By Orthology	HGNC:11120|OrthoInspector;EnsEMBL-Compara;OMA;PhylomeDB;Panther;OrthoFinder;Roundup	"acid sphingomyelin phosphodiesterase activity", "ceramide biosynthetic process", "extracellular region", "extracellular space", "hydrolase activity", "hydrolase activity, acting on glycosyl bonds", "lipid droplet disassembly", "lipid metabolic process", "lysosome", "metabolic process", "metal ion binding", "phosphoric diester hydrolase activity", "sphingolipid metabolic process", "sphingomyelin …	N.A.	Predicted to enable acid sphingomyelin phosphodiesterase activity. Involved in lipid droplet disassembly. Predicted to be located in extracellular space and lysosome. Human ortholog(s) of this gene implicated in Niemann-Pick disease type A and Niemann-Pick disease type B. Is an ortholog of human SMPD1 (sphingomyelin phosphodiesterase 1).	Enriched in intestine according to RNA-seq. Affected by alg-1, isp-1, sma-2, sma-4, smgl-1, csr-1, prg-1, ubc-9, puf-8, clk-1, daf-2, glp-1, ham-3, swsn-2.2, npr-1, cox-5B, jmjd-3.1, dop-1, hsf-1, rbr-2, chd-3, let-418, mir-34, mafr-1, daf-12, dpy-21, glh-4, glh-1, pgl-1, pgl-3, hrde-1, morc-1, exc-7, mbl-1, emb-4, sid-3, sta-1, lin-22, his-3, elt-2, elt-7, hpl-2, hmg-3, flr-4, thoc-5, pry-1, nhl…	WBPaper00032243|pmid18832646, WBPaper00038491|pmid21647448, WBPaper00041633|pmid23049887, WBPaper00042257|pmid23496871, WBPaper00045355|pmid24854345, WBPaper00049081|pmid26773047, WBPaper00053423|pmid29203330, WBPaper00053559|pmid29313356, WBPaper00055090|pmid30120140, WBPaper00058665|pmid31576668, WBPaper00059117|pmid31940482, WBPaper00059755|pmid32482227
WBGene00000469	WBGene00000469	ces-2	Caenorhabditis elegans	protein_coding_gene	ZK909.4	CELE_ZK909.4	ZK909.4.1	N.A.	CE15479	CE15479|HMMPANTHER:PTHR11988:SF44|HMMPANTHER:PTHR11988|PFSCAN:PS50217|SMART:SM00338|PFAM:PF07716|SUPERFAMILY:SSF57959|INTERPRO:IPR004827|INTERPRO:IPR040223	Q94126	Q94126	TF315869	NM_061209.6	NP_493610.1	I 28.85 +/- 0.01	sjj_ZK909.4|I-7M02, mv_AAC47277, cenix:172-a9	excretory duct cell development variant, transgene expression reduced	apoptosis fails to occur, asymmetric cell division variant, cell cleavage variant, ectopic expression transgene, programmed cell death variant, protein expression ectopic, spindle orientation variant	gk496445|Substitution|Missense, gk634642|Substitution|Missense, gk690730|Substitution|Missense, gk695226|Substitution|Missense	ces-1|Genetic;Regulatory, afd-1|Physical, atf-2|Physical, atf-8|Physical, cebp-2|Physical, ced-3|Genetic, ced-4|Genetic, ced-9|Genetic, ces-2|Physical, ces-2|Physical, egl-13|Physical, fbp-1|Physical, hda-11|Physical, hlh-33|Physical, hsp-3|Regulatory, jmjd-3.2|Physical, let-60|Regulatory, lin-15A|Physical, lin-48|Regulatory, nhr-111|Physical, nhr-271|Physical, par-3|Physical, pax-3|Physical, pdf…	excretory duct cell, R1AL, R1AR, R1BL, R1BR, R1stL, R1stR, R2AL, R2AR, R2BL, R2BR, R2stL, R2stR, R3AL, R3AR, R3BL, R3BR, R3stL, R3stR, R4AL, R4AR, R4BL, R4BR, R4stL, R4stR, R5AL, R5AR, R5BL, R5BR, R5stL, R5stR, R6AL, R6AR, R6BL, R6BR, R6stL, R6stR, R7AL, R7AR, R7BL, R7BR, R7stL, R7stR, R8AL, R8AR, R8BL, R8BR, R8stL, R8stR, R9AL, R9AR, R9BL, R9BR, R9stL, R9stR	gon_male_dtc anterior, gon_male_dtc posterior, hypodermis, pharynx, ray, Z1.p, Z4.a	embryo Ce, larva Ce	1-day post-L4 adult hermaphrodite Ce, 2-days post-L4 adult hermaphrodite Ce, 24-cell embryo Ce, 3-days post-L4 adult hermaphrodite Ce, 3-fold embryo Ce, 4-days post-L4 adult hermaphrodite Ce, 5-days post-L4 adult hermaphrodite Ce, 6-days post-L4 adult hermaphrodite Ce, 7-10 days post-L4 adult hermaphrodite Ce, adult Ce, adult hermaphrodite Ce, all stages Ce, blastula embryo Ce, dauer larva Ce, em…	acute lymphoblastic leukemia|By Experiment, osteoporosis|By Orthology	HGNC:2697|OrthoInspector;Roundup;TreeFam;Panther;EnsEMBL-Compara, HGNC:11722|OrthoInspector;PhylomeDB;TreeFam;Panther;EnsEMBL-Compara, HGNC:4977|OrthoInspector;TreeFam;Panther;EnsEMBL-Compara	"aging", "apoptotic process", "DNA binding", "DNA-binding transcription factor activity", "DNA-binding transcription factor activity, RNA polymerase II-specific", "identical protein binding", "nucleus", "positive regulation of programmed cell death", "positive regulation of transcription by RNA polymerase II", "protein binding", "protein heterodimerization activity", "regulation of transcription …	ces-2 encodes a basic region leucine-zipper (bZIP) transcription factor, most similar in sequence and binding specificity to the PAR (proline- and acid-rich) subfamily of bZIP proteins\; ces-2 is required to activate programmed cell death in the sister cells of the serotoninergic neurosecretory motor (NSM) neurons, and is transcriptionally inhibited by activated LET-60(G12V)\; in regulating progr…	Enables RNA polymerase II transcription regulatory region sequence-specific DNA binding activity\; identical protein binding activity\; and protein heterodimerization activity. Involved in several processes, including aging\; positive regulation of programmed cell death\; and positive regulation of transcription by RNA polymerase II. Predicted to be located in nucleus. Expressed in excretory duct…	Enriched in pharynx, gon_male_dtc posterior, gon_male_dtc anterior, Z1.p, Z4.a, hypodermis and ray according to microarray and RNA-seq. Affected by daf-12, cyc-1, rsr-2, smg-2, smgl-1, ubc-9, gld-2, clk-1, rsd-2, csr-1, npr-1, daf-2, chd-3, let-418, glh-4, glh-1, pgl-1, pgl-3, hrde-1, morc-1, sma-2, sma-4, dpy-7, hpl-2, alg-1, hmg-3, flr-4, eat-2, pfd-6, nhl-2, rrf-3, sek-1, kri-1, mpk-2, nmad-1,…	WBPaper00001224|pmid2691329, WBPaper00001433|pmid1794327, WBPaper00001487|pmid1809356, WBPaper00001491|pmid1374952, WBPaper00001642|pmid1469391, WBPaper00002123|pmid7579527, WBPaper00002212|pmid7587090, WBPaper00002388|pmid8825409, WBPaper00002422|pmid8929668, WBPaper00002437|pmid N.A., WBPaper00002515|pmid8700229, WBPaper00002528|pmid8700216, WBPaper00002592|pmid8944314, WBPaper00002624|pmid9257…
WBGene00008560	WBGene00008560	pho-13	Caenorhabditis elegans	protein_coding_gene	F07H5.9	CELE_F07H5.9	F07H5.9b, F07H5.9a.1	N.A.	CE35850	CE35850|HMMPANTHER:PTHR11567|HMMPANTHER:PTHR11567:SF104|SCANPROSITE:PS00616|PFAM:PF00328|SUPERFAMILY:SSF53254|INTERPRO:IPR000560|INTERPRO:IPR029033|Active_site	Q19175	Q19175	N.A.	NM_063474.6, NR_023949.1	NP_495875.2	II 0.90 +/- 0.00	mv_F07H5.9, cenix:208-e5, sjj_F07H5.9|II-6K16	N.A.	N.A.	gk149588|Substitution|Missense, gk149589|Substitution|Missense, gk149590|Substitution|Missense, gk149591|Substitution|Missense, gk596483|Substitution|Missense, gk700618|Substitution|Missense, gk724209|Substitution|Missense, gk730753|Substitution|Missense, gk783595|Substitution|Missense, gk813896|Substitution|Missense, gk893904|Substitution|Missense, gk911659|Substitution|Missense, gk926979|Substi…	N.A.	N.A.	intestine	N.A.	1-day post-L4 adult hermaphrodite Ce, 10-days post-L4 adult hermaphrodite Ce, 2-days post-L4 adult hermaphrodite Ce, 24-cell embryo Ce, 3-days post-L4 adult hermaphrodite Ce, 4-days post-L4 adult hermaphrodite Ce, 5-days post-L4 adult hermaphrodite Ce, 6-days post-L4 adult hermaphrodite Ce, 7-10 days post-L4 adult hermaphrodite Ce, 7-days post-L4 adult hermaphrodite Ce, 96-cell embryo Ce, adult C…	N.A.	N.A.	"dephosphorylation", "phosphatase activity"	N.A.	Predicted to enable phosphatase activity. Predicted to be involved in dephosphorylation.	Enriched in intestine according to tiling array and RNA-seq. Affected by cyc-1, smgl-1, smgl-2, nhr-8, eat-2, let-7, gld-1, lem-2, emr-1, ubc-9, clk-1, lin-35, skn-1, daf-16, swsn-2.2, elt-2, npr-1, cox-5B, jmjd-1.2, daf-2, hsf-1, rbr-2, chd-3, let-418, dpy-21, mir-34, glh-4, glh-1, pgl-1, pgl-3, ash-2, vit-2, alg-1, emb-4, sma-2, lin-22, mir-71, his-3, elt-7, isp-1, nuo-6, egl-9, hmg-3, flr-4, a…	WBPaper00038491|pmid21647448, WBPaper00055090|pmid30120140
WBGene00009397	WBGene00009397	clec-66	Caenorhabditis elegans	protein_coding_gene	F35C5.9	CELE_F35C5.9	F35C5.9.1	N.A.	CE15950	CE15950|HMMPANTHER:PTHR31024:SF8|HMMPANTHER:PTHR31024|PFSCAN:PS50041|PFSCAN:PS50234|SMART:SM00034|SMART:SM00327|PFAM:PF00092|SUPERFAMILY:SSF53300|SUPERFAMILY:SSF56436|INTERPRO:IPR001304|INTERPRO:IPR002035|INTERPRO:IPR016186|INTERPRO:IPR016187|INTERPRO:IPR036465	O45445	O45445	TF317104	NM_064345.6	NP_496746.1	II 12.45 +/- 0.01	cenix:201-d8, sjj_F35C5.9|II-8B23, mv_F35C5.9	dauer lifespan extended	N.A.	gk158298|Substitution|Missense, gk158309|Substitution|Missense, gk561792|Substitution|Missense, gk569293|Substitution|Missense, gk609664|Substitution|Missense, gk654777|Substitution|Missense, gk684366|Substitution|Missense, gk777952|Substitution|Missense, gk797534|Substitution|Missense, h15137|Substitution|Nonsense	rde-8|Physical	intestine	intestine	N.A.	1-day post-L4 adult hermaphrodite Ce, 10-days post-L4 adult hermaphrodite Ce, 2-days post-L4 adult hermaphrodite Ce, 3-days post-L4 adult hermaphrodite Ce, 4-days post-L4 adult hermaphrodite Ce, 5-days post-L4 adult hermaphrodite Ce, 6-days post-L4 adult hermaphrodite Ce, 7-10 days post-L4 adult hermaphrodite Ce, 7-days post-L4 adult hermaphrodite Ce, 96-cell embryo Ce, adult Ce, adult hermaphrod…	N.A.	N.A.	"carbohydrate binding", "innate immune response"	N.A.	Predicted to enable carbohydrate binding activity. Involved in innate immune response. Expressed in intestine.	Enriched in intestine according to tiling array and RNA-seq. Affected by daf-12, cyc-1, lin-15B, age-1, nhr-49, hcf-1, atfs-1, spg-7, wdr-23, smg-2, nhr-8, let-7, gld-1, prg-1, wrn-1, lin-35, elt-2, daf-2, glp-1, skn-1, fshr-1, mdt-15, hrde-1, daf-16, npr-1, jmjd-3.1, jmjd-1.2, blmp-1, hyl-2, hsf-1, rbr-2, let-418, lmn-1, mir-34, glh-4, glh-1, pgl-1, pgl-3, morc-1, alg-1, atm-1, emb-4, sid-3, sta…	WBPaper00031686|pmid18406370
WBGene00008205	WBGene00008205	sams-1	Caenorhabditis elegans	protein_coding_gene	C49F5.1	drop-4, CELE_C49F5.1	C49F5.1.1, C49F5.1.2, C49F5.1.3	N.A.	CE08852	CE08852|HMMPANTHER:PTHR11964:SF13|HMMPANTHER:PTHR11964|PIRSF:PIRSF000497|SCANPROSITE:PS00376|SCANPROSITE:PS00377|TIGRFAM:TIGR01034|PFAM:PF02773|PFAM:PF02772|PFAM:PF00438|SUPERFAMILY:SSF55973|INTERPRO:IPR002133|INTERPRO:IPR022628|INTERPRO:IPR022629|INTERPRO:IPR022630|INTERPRO:IPR022636|Metal_ion_binding_site	O17680	O17680	TF300511	NM_001381113.3	NP_001366882.1	X 6.80 +/- 0.02	mv_C49F5.1, cenix:125-c6, cenix:49-e12, sjj_C49F5.1|X-5P21	arsenite hypersensitive, avoids bacterial lawn, early larval arrest, ER stress response variant, extended life span, fat associated bodies increased, fat associated body size increased, fat content increased, growth rate variant, intestinal vacuole, lipid composition variant, lipid metabolism variant, locomotion variant, long, maternal sterile, metabolite content decreased, mRNA levels increased,…	arsenite hypersensitive, fat associated bodies increased, fat associated bodies variant, fat associated body size increased, growth rate variant, intestinal vacuole, lethal, lipid synthesis defective, mRNA levels increased, mRNA levels reduced, organism starvation response variant, reduced brood size, slow growth, small, sterile, transgene expression increased	ok2946|Deletion|Frameshift, tm3945|Deletion|Frameshift, gk295334|Substitution|Missense, gk295335|Substitution|Missense, gk295336|Substitution|Missense, gk295337|Substitution|Missense, gk337346|Substitution|Missense, gk616963|Substitution|Missense, gk710837|Substitution|Missense, gk758332|Substitution|Missense, gk906923|Substitution|Missense, ssd206|Substitution|Missense	drr-2|Genetic;Regulatory, pod-2|Genetic;Regulatory, sbp-1|Genetic;Regulatory, csr-1|Physical, eat-2|Regulatory, fasn-1|Genetic, fat-2|Regulatory, fat-7|Genetic, glh-1|Physical, hsp-16.2|Physical, irg-1|Regulatory, irg-6|Regulatory, let-767|Genetic, myrf-1|Physical, pid-2|Physical, pid-3|Physical, pod-1|Regulatory, sams-1|Physical, sams-1|Physical, sams-3|Physical, sams-4|Physical, sams-5|Physical…	body wall musculature, dorsal nerve cord, ventral nerve cord	germ line, germline precursor cell, hypodermis, intestine, OLL, PLM, PVD	adult Ce, embryo Ce, L1 larva Ce, L2 larva Ce, L3 larva Ce, L4 larva Ce	1-day post-L4 adult hermaphrodite Ce, 10-days post-L4 adult hermaphrodite Ce, 11-15 days post-L4 adult hermaphrodite Ce, 2-days post-L4 adult hermaphrodite Ce, 20-days post-L4 adult hermaphrodite Ce, 3-days post-L4 adult hermaphrodite Ce, 4-days post-L4 adult hermaphrodite Ce, 5-days post-L4 adult hermaphrodite Ce, 6-days post-L4 adult hermaphrodite Ce, 7-days post-L4 adult hermaphrodite Ce, adul…	lipid metabolism disorder|By Experiment, hypermethioninemia|By Orthology	HGNC:6903|OrthoInspector;EnsEMBL-Compara;OMA;Hieranoid;PhylomeDB;Inparanoid;Panther;OrthoFinder, HGNC:6904|OrthoInspector;EnsEMBL-Compara;OMA;Hieranoid;PhylomeDB;Inparanoid;Panther;OrthoFinder	"ATP binding", "cytosol", "metal ion binding", "methionine adenosyltransferase activity", "negative regulation of lipid storage", "nucleotide binding", "one-carbon metabolic process", "protein binding", "S-adenosylmethionine biosynthetic process", "transferase activity"	sams-1 encodes an S-adenosyl methionine synthetase\; by homology, SAMS-1 is predicted to function as a methyl-group donor in many biochemical reactions\; sams-1 expression levels are negatively regulated by dietary restriction (as seen in eat-2 mutant animals), suggesting that increased lifespan due to dietary restriction is due, in part, to reducing the activity of key metabolic enzymes\; loss o…	Predicted to enable methionine adenosyltransferase activity. Involved in negative regulation of lipid storage. Predicted to be located in cytosol. Expressed in body wall musculature\; dorsal nerve cord\; and ventral nerve cord. Used to study lipid metabolism disorder. Human ortholog(s) of this gene implicated in hypermethioninemia. Is an ortholog of human MAT1A (methionine adenosyltransferase 1A)…	Enriched in germ line, PVD, OLL, germline precursor cell, hypodermis, PLM and intestine according to proteomic study, microarray, tiling array and RNA-seq. Affected by daf-2, lin-35, ets-4, aak-2, pod-2, atx-3, K10D11.2, smgl-1, let-7, gld-1, ubc-9, pept-1, clk-1, skn-1, daf-16, npr-1, blmp-1, lmn-1, dpy-21, mir-34, dep-1, elli-1, glh-4, glh-1, pgl-1, pgl-3, mir-35, alg-1, atm-1, sma-2, lin-22, m…	WBPaper00026715|pmid16103914, WBPaper00030894|pmid17673661, WBPaper00031586|pmid18331616, WBPaper00032932|pmid19239417, WBPaper00037015|pmid N.A., WBPaper00037449|pmid N.A., WBPaper00038215|pmid21389045, WBPaper00038491|pmid21647448, WBPaper00038832|pmid N.A., WBPaper00039084|pmid N.A., WBPaper00040386|pmid22035958, WBPaper00041985|pmid23316847, WBPaper00042203|pmid23540700, WBPaper00042204|pmid2…
WBGene00009432	WBGene00009432	cld-9	Caenorhabditis elegans	protein_coding_gene	F35E12.8	CELE_F35E12.8	F35E12.8a.1, F35E12.8b.1	N.A.	CE32403, CE45259	CE32403|HMMPANTHER:PTHR21447|HMMPANTHER:PTHR21447:SF5|PFAM:PF02408|INTERPRO:IPR003366, CE45259|HMMPANTHER:PTHR21447|HMMPANTHER:PTHR21447:SF5	E0AHD6, G5EFQ6	G5EFQ6	TF315594	NM_001269614.2, NM_001269615.3	NP_001256543.1, NP_001256544.1	V 5.59	cenix:147-d10, mv_F35E12.8, sjj_F35E12.8|V-9E07	chemical hypersensitive	N.A.	gk252309|Substitution|Missense, gk252312|Substitution|Missense, gk252313|Substitution|Missense, gk336202|Substitution|Missense, gk365492|Substitution|Missense, gk472838|Substitution|Missense, gk504419|Substitution|Missense, gk506185|Substitution|Missense, gk555845|Substitution|Missense, gk585389|Substitution|Missense, gk614545|Substitution|Missense, gk666742|Substitution|Missense, gk746008|Substi…	N.A.	N.A.	head mesodermal cell, intestine, rectal gland cell	N.A.	1-day post-L4 adult hermaphrodite Ce, 2-days post-L4 adult hermaphrodite Ce, 24-cell embryo Ce, 3-days post-L4 adult hermaphrodite Ce, 4-days post-L4 adult hermaphrodite Ce, 5-days post-L4 adult hermaphrodite Ce, 6-days post-L4 adult hermaphrodite Ce, 7-10 days post-L4 adult hermaphrodite Ce, 96-cell embryo Ce, adult Ce, adult hermaphrodite Ce, all stages Ce, blastula embryo Ce, dauer larva Ce, e…	N.A.	N.A.	"innate immune response"	N.A.	Involved in innate immune response.	Enriched in intestine, head mesodermal cell and rectal gland cell according to tiling array and RNA-seq. Affected by cyc-1, lin-15B, age-1, wdr-23, smg-2, smgl-1, nhr-8, tatn-1, lem-2, emr-1, clk-1, daf-2, glp-1, skn-1, mdt-15, daf-16, ham-3, swsn-2.2, npr-1, jmjd-3.1, jmjd-1.2, hyl-2, rbr-2, chd-3, let-418, mir-34, glh-4, glh-1, pgl-1, pgl-3, mir-35, sid-3, sta-1, lin-22, elt-2, isp-1, his-69, h…	WBPaper00028482|pmid16968778, WBPaper00028789|pmid17096597, WBPaper00036653|pmid20647387, WBPaper00044557|pmid24311442
WBGene00000963	WBGene00000963	dhp-1	Caenorhabditis elegans	protein_coding_gene	R06C7.3	CeCRMP\/DHP-1, CELE_R06C7.3	R06C7.3.1, R06C7.3.2	N.A.	CE30293	CE30293|HMMPANTHER:PTHR11647:SF65|HMMPANTHER:PTHR11647|TIGRFAM:TIGR02033|PFAM:PF01979|SUPERFAMILY:SSF51556|SUPERFAMILY:SSF51338|INTERPRO:IPR006680|INTERPRO:IPR011059|INTERPRO:IPR011778|INTERPRO:IPR030633|INTERPRO:IPR032466|Metal_ion_binding_site	Q21773	Q21773	N.A.	NM_001026412.5	NP_001021583.1	I 1.85 +/- 0.00	sjj_R06C7.3|I-3H01, cenix:79-b12, mv_R06C7.3	N.A.	N.A.	tm1072|Deletion|Frameshift, gk114585|Substitution|Missense, gk114589|Substitution|Missense, gk114591|Substitution|Missense, gk114593|Substitution|Missense, gk1336|Substitution|Missense, gk1337|Substitution|Missense, gk342034|Substitution|Missense, gk361764|Substitution|Missense, gk390060|Substitution|Missense, gk422579|Substitution|Missense, gk537188|Substitution|Missense, gk712583|Substitution|M…	smo-1|Physical	head, hyp7 syncytium, hypodermis, pharynx	ASER, germline precursor cell, head mesodermal cell, hypodermis, intestine, OLL, PVD	2-fold embryo Ce, 3-fold embryo Ce, adult Ce, gastrulating embryo Ce, L1 larva Ce, L2 larva Ce	1-day post-L4 adult hermaphrodite Ce, 2-days post-L4 adult hermaphrodite Ce, 3-days post-L4 adult hermaphrodite Ce, 5-days post-L4 adult hermaphrodite Ce, 6-days post-L4 adult hermaphrodite Ce, adult Ce, adult hermaphrodite Ce, all stages Ce, blastula embryo Ce, dauer larva Ce, embryo Ce, L1 larva Ce, L2 larva Ce, L3 larva Ce, L4 larva Ce, L4-adult lethargus Ce, larva Ce	purine-pyrimidine metabolic disorder|By Orthology, dihydropyrimidinase deficiency|By Orthology	HGNC:3016|OrthoInspector;OMA;Hieranoid;PhylomeDB;Panther;OrthoFinder, HGNC:3013|OrthoInspector;OMA;Hieranoid;PhylomeDB;Inparanoid;Panther;OrthoFinder;Roundup, HGNC:3014|OrthoInspector;OMA;Hieranoid;PhylomeDB;Inparanoid;Panther;OrthoFinder, HGNC:3015|OrthoInspector;OMA;Hieranoid;PhylomeDB;Inparanoid;Panther;OrthoFinder;Roundup, HGNC:2365|OrthoInspector;OMA;Hieranoid;PhylomeDB;Inparanoid;Panther;Or…	"cytoplasm", "dihydropyrimidinase activity", "hydrolase activity", "hydrolase activity, acting on carbon-nitrogen (but not peptide) bonds", "hydrolase activity, acting on carbon-nitrogen (but not peptide) bonds, in cyclic amides", "metal ion binding", "nucleobase catabolic process", "nucleus", "pyrimidine nucleobase catabolic process"	dhp-1 encodes a homolog of the human gene DPYS, which when mutated leads to dihydropyrimidinuria (OMIM:222748).	Enables hydrolase activity, acting on carbon-nitrogen (but not peptide) bonds, in cyclic amides. Involved in pyrimidine nucleobase catabolic process. Located in nucleus. Expressed in hyp7 syncytium. Human ortholog(s) of this gene implicated in dihydropyrimidinase deficiency and purine-pyrimidine metabolic disorder. Is an ortholog of human DPYS (dihydropyrimidinase) and DPYSL3 (dihydropyrimidinase…	Enriched in PVD, OLL, germline precursor cell, hypodermis, intestine, ASER and head mesodermal cell according to microarray, tiling array and RNA-seq. Affected by sam-10, lin-15B, K10D11.2, hcf-1, smgl-1, eat-2, htz-1, daf-2, jmjd-3.1, jmjd-1.2, hsf-1, rbr-2, skn-1, mir-34, daf-12, daf-16, dpy-21, alg-2, emb-4, sma-2, sma-4, lin-22, smg-2, thoc-5, pmt-2, pry-1, damt-1, nhl-2, hsp-6, sek-1, aak-1,…	WBPaper00004552|pmid11167013, WBPaper00023608|pmid N.A., WBPaper00023701|pmid N.A., WBPaper00038491|pmid21647448, WBPaper00055090|pmid30120140, WBPaper00060038|pmid32760883
Your Input	WormBase Gene ID	Public Name	Species	Biotype	Sequence Name	Other Name	Transcript	Operon	WormPep	Protein Domain	UniProt	Reference UniProt ID	TreeFam	RefSeq_mRNA	RefSeq_protein	Genetic Map Position	RNAi Clone	RNAi Phenotype Observed	Allele Phenotype Observed	Coding_exon Non_silent Allele	Interacting Gene	Expr_pattern Tissue	Genomic Study Tissue	Expr_pattern LifeStage	Genomic Study LifeStage	Disease Info	Human Ortholog	Gene Ontology Association	Concise Description	Automated Description	Expression Cluster Summary	Reference
WBGene00000133	WBGene00000133	amt-1	Caenorhabditis elegans	protein_coding_gene	C05E11.4	CELE_C05E11.4	C05E11.4.1	N.A.	CE06770	CE06770|HMMPANTHER:PTHR11730|HMMPANTHER:PTHR11730:SF67|SCANPROSITE:PS01219|TIGRFAM:TIGR00836|PFAM:PF00909|SUPERFAMILY:SSF111352|INTERPRO:IPR001905|INTERPRO:IPR024041|INTERPRO:IPR029020	P54145	P54145	TF313588	NM_076383.5	NP_508784.1	X -7.23 +/- 0.01	mv_C05E11.4, sjj_C05E11.4|X-2B04, cenix:58-h8	N.A.	N.A.	ok2318|Deletion|Frameshift, gk278409|Substitution|Missense, gk278410|Substitution|Missense, gk278411|Substitution|Missense, gk278412|Substitution|Missense, gk278413|Substitution|Missense, gk278414|Substitution|Missense, gk278416|Substitution|Missense, gk411871|Substitution|Missense, gk429076|Substitution|Missense, gk466826|Substitution|Missense, gk538357|Substitution|Missense, gk596953|Substituti…	N.A.	N.A.	N.A.	N.A.	N.A.	N.A.	N.A.	"ammonium transmembrane transport", "ammonium transmembrane transporter activity", "integral component of membrane", "integral component of plasma membrane", "membrane"	amt-1 encodes a transmembrane transporter that by homology, is predicted to transport ammonium ions across the plasma membrane\; as loss of amt-1 activity via large-scale RNAi screens does not result in any obvious abnormalities, the precise role of AMT-1 in C. elegans development and\/or behavior is not yet known.	Predicted to enable ammonium transmembrane transporter activity. Predicted to be involved in ammonium transmembrane transport. Predicted to be integral component of plasma membrane.	Affected by hcf-1, rsr-2, pgrn-1, blmp-1, ubc-9, fbf-1, clk-1, wrn-1, ham-3, swsn-2.2, npr-1, jmjd-3.1, jmjd-1.2, rbr-2, mir-60, dpy-21, cox-5B, mir-34, daf-12, daf-16, set-4, glh-4, glh-1, pgl-1, pgl-3, hrde-1, alg-1, emb-4, sma-2, sma-4, smg-2, mir-71, ins-11, nhr-49, daf-2, isp-1, nuo-6, drh-3, his-69, his-70, his-72, his-74, his-71, egl-9, hmg-3, spt-16, flr-4, eat-2, pmt-2, damt-1, atfs-1, n…	N.A.
WBGene00013073	WBGene00013073	hmit-1.1	Caenorhabditis elegans	protein_coding_gene	Y51A2D.4	CELE_Y51A2D.4	Y51A2D.4.1	N.A.	CE19201	CE19201|HMMPANTHER:PTHR48020:SF10|HMMPANTHER:PTHR48020|PFSCAN:PS50850|PRINTS:PR00171|SCANPROSITE:PS00217|SCANPROSITE:PS00216|PFAM:PF00083|SUPERFAMILY:SSF103473|INTERPRO:IPR003663|INTERPRO:IPR005828|INTERPRO:IPR036259	Q9XXR3	Q9XXR3	TF314916	NM_075222.5	NP_507623.1	V 16.81 +/- 0.02	sjj_Y51A2D.4|V-12K01, mv_Y51A2D.4, cenix:50-b3	N.A.	organism high sodium chloride hypersensitive	tm3301|Deletion|Frameshift, gk262591|Substitution|Missense, gk262592|Substitution|Missense, gk435124|Substitution|Missense, gk517014|Substitution|Missense, gk685860|Substitution|Missense, gk757095|Substitution|Missense, gk792571|Substitution|Missense, gk823481|Substitution|Missense, gk869260|Substitution|Missense, gk882160|Substitution|Missense, gk934852|Substitution|Missense	elt-1|Physical	intestinal cell, intestine	AFD, ASER, head mesodermal cell, intestine, PLM	adult hermaphrodite Ce	1-cell embryo Ce, 1-day post-L4 adult hermaphrodite Ce, 2-days post-L4 adult hermaphrodite Ce, 3-days post-L4 adult hermaphrodite Ce, 3-fold embryo Ce, 4-days post-L4 adult hermaphrodite Ce, 6-days post-L4 adult hermaphrodite Ce, 7-10 days post-L4 adult hermaphrodite Ce, 7-days post-L4 adult hermaphrodite Ce, 96-cell embryo Ce, adult Ce, adult hermaphrodite Ce, adult male Ce, all stages Ce, blast…	N.A.	HGNC:15956|OrthoInspector;Hieranoid;PhylomeDB;Inparanoid;Panther;OrthoFinder;Roundup;TreeFam	"apical plasma membrane", "integral component of membrane", "membrane", "myo-inositol transport", "myo-inositol:proton symporter activity", "plasma membrane", "transmembrane transport", "transmembrane transporter activity"	hmit-1.1 encodes one of three C. elegans proton (H+)-dependent myo-inositol transporters\; loss of hmit-1.1 activity via large-scale RNAi result in no obvious abnormalities but by homology, HMIT-1.1 is predicted to function as a plasma membrane protein required for the regulated uptake of myo-inositol and thus potentially for regulation of cell signaling and intracellular osmolarity.	Predicted to enable myo-inositol:proton symporter activity. Predicted to be involved in myo-inositol transport and transmembrane transport. Located in apical plasma membrane. Expressed in intestinal cell. Is an ortholog of human SLC2A13 (solute carrier family 2 member 13).	Enriched in intestine, AFD, ASER, PLM and head mesodermal cell according to tiling array, RNA-seq and microarray. Affected by rde-4, cyc-1, hcf-1, smg-2, nhr-8, eat-2, pgrn-1, tatn-1, emr-1, lem-2, csr-1, drh-3, bar-1, hlh-30, aak-2, crtc-1, daf-2, glp-1, hrde-1, elt-2, npr-1, jmjd-3.1, jmjd-1.2, hsf-1, rbr-2, let-418, cec-4, mir-34, morc-1, vgln-1, alg-1, alg-2, fog-2, mir-71, elt-7, dpy-7, isp-…	WBPaper00038491|pmid21647448, WBPaper00038529|pmid21679696, WBPaper00055090|pmid30120140, WBPaper00060410|pmid33006972
WBGene00009221	WBGene00009221	acs-2	Caenorhabditis elegans	protein_coding_gene	F28F8.2	CELE_F28F8.2	F28F8.2.1	N.A.	CE09756	CE09756|HMMPANTHER:PTHR43201:SF4|HMMPANTHER:PTHR43201|SCANPROSITE:PS00455|PFAM:PF13193|PFAM:PF00501|SUPERFAMILY:SSF56801|INTERPRO:IPR000873|INTERPRO:IPR025110|INTERPRO:IPR042099|INTERPRO:IPR045851	O18693	O18693	TF313466	NM_074468.6	NP_506869.1	V 8.36 +/- 0.01	mv_F28F8.2, sjj_F28F8.2|V-10A16, cenix:53-b9	embryonic arrest, fat content increased, reduced brood size	fat content increased	gk256082|Substitution|Missense, gk256084|Substitution|Nonsense, gk582040|Substitution|Missense, gk646377|Substitution|Missense, gk646861|Substitution|Missense, gk669259|Substitution|Missense, gk723017|Substitution|Missense, gk723832|Substitution|Missense, gk764179|Substitution|Missense, gk791024|Substitution|Nonsense, gk811841|Substitution|Missense, gk878833|Substitution|Missense, gk903274|Substi…	nhr-49|Genetic;Regulatory, csr-1|Physical, ctbp-1|Regulatory, daf-2|Regulatory, elo-2|Regulatory, elt-2|Regulatory, fat-2|Regulatory, fat-7|Regulatory, glh-1|Physical, hda-1|Physical, hlh-29|Regulatory, lbp-5|Regulatory, lbp-8|Regulatory, lin-53|Physical, mrg-1|Physical, myrf-1|Physical, nhr-64|Regulatory, sbp-1|Regulatory, smo-1|Physical	body wall musculature, hypodermis, intestine, neuron, pharyngeal muscle cell, pharynx	AS neuron, AVK, DA neuron, DD neuron, germ line, head mesodermal cell, hermaphrodite-specific anatomical entity, intestine, male-specific anatomical entity, neuron, VA neuron	N.A.	1-day post-L4 adult hermaphrodite Ce, 10-days post-L4 adult hermaphrodite Ce, 2-days post-L4 adult hermaphrodite Ce, 20-days post-L4 adult hermaphrodite Ce, 3-days post-L4 adult hermaphrodite Ce, 3-fold embryo Ce, 4-days post-L4 adult hermaphrodite Ce, 5-days post-L4 adult hermaphrodite Ce, 6-days post-L4 adult hermaphrodite Ce, 7-10 days post-L4 adult hermaphrodite Ce, adult Ce, adult hermaphrod…	N.A.	HGNC:26101|OrthoInspector;EnsEMBL-Compara;OMA;Hieranoid;PhylomeDB;Inparanoid;Panther;OrthoFinder	"fatty acid metabolic process", "medium-chain fatty acid-CoA ligase activity", "mitochondrion"	acs-2 encodes an acyl-CoA synthetase\; by homology, ACS-2 is predicted to catalyze conversion of a fatty acid to Acyl-CoA for subsequent beta oxidation\; accordingly, loss of acs-2 activity via RNAi results in defects in fat metabolism\; an ACS-2::GFP reporter fusion protein is widely expressed and appears to localize to mitochondria\; acs-2 expression is positively regulated by the NHR-49 nuclea…	Predicted to enable medium-chain fatty acid-CoA ligase activity. Involved in fatty acid metabolic process. Located in mitochondrion. Expressed in body wall musculature\; hypodermis\; intestine\; neurons\; and pharynx. Is an ortholog of human ACSF2 (acyl-CoA synthetase family member 2).	Enriched in germ line, DA neuron, VA neuron, male-specific anatomical entity, AVK, head mesodermal cell, AS neuron, hermaphrodite-specific anatomical entity, intestine, neuron and DD neuron according to proteomic study, tiling array, RNA-seq and microarray. Affected by rheb-1, clk-1, cyc-1, isp-1, hlh-30, cid-1, ung-1, sma-2, sma-4, nhr-49, hpl-2, smgl-1, smgl-2, eat-2, lem-2, emr-1, bar-1, prg-1…	WBPaper00024111|pmid N.A., WBPaper00025114|pmid15719061, WBPaper00026097|pmid N.A., WBPaper00026800|pmid16157872, WBPaper00027288|pmid18050471, WBPaper00027365|pmid16651656, WBPaper00029292|pmid17435249, WBPaper00031804|pmid18424809, WBPaper00032563|pmid N.A., WBPaper00033126|pmid19416714, WBPaper00033136|pmid19427851, WBPaper00034335|pmid N.A., WBPaper00035503|pmid19936816, WBPaper00036075|pmid2…
WBGene00009824	WBGene00009824	gpdh-1	Caenorhabditis elegans	protein_coding_gene	F47G4.3	CELE_F47G4.3	F47G4.3.1	N.A.	CE18701	CE18701|HMMPANTHER:PTHR11728|HMMPANTHER:PTHR11728:SF9|PIRSF:PIRSF000114|PRINTS:PR00077|SCANPROSITE:PS00957|TIGRFAM:TIGR03376|PFAM:PF07479|PFAM:PF01210|SUPERFAMILY:SSF48179|SUPERFAMILY:SSF51735|INTERPRO:IPR006109|INTERPRO:IPR006168|INTERPRO:IPR008927|INTERPRO:IPR011128|INTERPRO:IPR013328|INTERPRO:IPR017751|INTERPRO:IPR036291|Active_site	Q9XTS4	Q9XTS4	TF300836	NM_061053.8	NP_493454.1	I 23.02 +/- 0.01	mv_F47G4.3, cenix:74-f12, sjj_F47G4.3|I-7E09	N.A.	N.A.	ok1558|Deletion|Frameshift, gk128403|Substitution|Missense, gk356216|Substitution|Missense, gk357697|Substitution|Missense, gk409229|Substitution|Missense, gk413584|Substitution|Missense, gk663395|Substitution|Missense, gk715703|Substitution|Missense, gk733510|Substitution|Missense, gk861435|Substitution|Nonsense, gk925783|Substitution|Missense, h7155|Substitution|Nonsense	abu-14|Regulatory, acdh-4|Regulatory, asd-2|Regulatory, bed-1|Regulatory, C37C3.2|Regulatory, C38C6.3|Regulatory, C50D2.1|Regulatory, ccr-4|Regulatory, cct-2|Regulatory, cct-4|Regulatory, cct-7|Regulatory, cct-8|Regulatory, cdc-37|Regulatory, cdk-12|Regulatory, copb-2|Regulatory, ctbp-1|Regulatory, cuti-1|Regulatory, dab-1|Regulatory, dpy-10|Regulatory, dpy-23|Regulatory, dpy-7|Regulatory, dpy-8|…	hypodermis, intestine	AFD, intestine, NSM, somatic gonad precursor, Z1, Z4	N.A.	1-day post-L4 adult hermaphrodite Ce, 10-days post-L4 adult hermaphrodite Ce, 2-days post-L4 adult hermaphrodite Ce, 20-days post-L4 adult hermaphrodite Ce, 3-days post-L4 adult hermaphrodite Ce, 4-days post-L4 adult hermaphrodite Ce, 5-days post-L4 adult hermaphrodite Ce, 6-days post-L4 adult hermaphrodite Ce, 7-10 days post-L4 adult hermaphrodite Ce, 7-days post-L4 adult hermaphrodite Ce, adult…	Brugada syndrome 2|By Orthology	HGNC:28956|OrthoFinder;PhylomeDB;TreeFam;Panther;EnsEMBL-Compara, HGNC:4455|OrthoFinder;PhylomeDB;TreeFam;Panther;EnsEMBL-Compara	"carbohydrate metabolic process", "cytosol", "glycerol-3-phosphate catabolic process", "glycerol-3-phosphate dehydrogenase (quinone) activity", "glycerol-3-phosphate dehydrogenase [NAD+] activity", "glycerol-3-phosphate dehydrogenase complex", "glycerol-3-phosphate metabolic process", "NAD binding", "NADH oxidation", "oxidoreductase activity", "oxidoreductase activity, acting on the CH-OH group o…	gpdh-1 encodes one of two C. elegans glycerol 3-phosphate dehydrogenases\; gpdh-1 mRNA expression is upregulated in response to hypertonicity, suggesting that GPDH-1 does play a role in osmotic stress adaptation in C. elegans via glycerol biosynthesis\; regulation of gpdh-1 expression is controlled, in part, by a pathway that includes the OSM-8 mucin and the PTR-23 Patched-like receptor.	Predicted to enable glycerol-3-phosphate dehydrogenase (quinone) activity and glycerol-3-phosphate dehydrogenase [NAD+] activity. Predicted to be involved in NADH oxidation and glycerol-3-phosphate metabolic process. Predicted to be located in cytosol. Predicted to be part of glycerol-3-phosphate dehydrogenase complex. Expressed in hypodermis and intestine. Human ortholog(s) of this gene implicat…	Enriched in NSM, Z4, Z1, AFD, intestine and somatic gonad precursor according to tiling array and RNA-seq. Affected by cyc-1, lin-35, hpl-2, lem-2, bar-1, daf-2, glp-1, skn-1, mdt-15, swsn-2.2, hpk-1, cox-5B, jmjd-3.1, jmjd-1.2, hsf-1, set-25, met-2, mir-34, daf-12, daf-16, dpy-21, glh-4, glh-1, pgl-1, pgl-3, hrde-1, alg-1, alg-2, alg-5, ins-11, dpy-7, isp-1, nuo-6, set-9, egl-9, atfs-1, nhl-2, p…	WBPaper00006432|pmid14644776, WBPaper00028383|pmid16880390, WBPaper00031648|pmid18383023, WBPaper00032037|pmid18648821, WBPaper00032609|pmid N.A., WBPaper00032613|pmid N.A., WBPaper00033086|pmid19398339, WBPaper00033916|pmid N.A., WBPaper00035873|pmid20126308, WBPaper00037578|pmid N.A., WBPaper00038491|pmid21647448, WBPaper00041657|pmid23076791, WBPaper00042257|pmid23496871, WBPaper00046151|pmid2…
WBGene00009706	WBGene00009706	argk-1	Caenorhabditis elegans	protein_coding_gene	F44G3.2	CELE_F44G3.2	F44G3.2.1	N.A.	CE16034	CE16034|HMMPANTHER:PTHR11547:SF20|HMMPANTHER:PTHR11547|PFSCAN:PS51509|PFSCAN:PS51510|PFAM:PF00217|PFAM:PF02807|SUPERFAMILY:SSF48034|SUPERFAMILY:SSF55931|INTERPRO:IPR000749|INTERPRO:IPR014746|INTERPRO:IPR022413|INTERPRO:IPR022414|INTERPRO:IPR036802	O45518	O45518	TF314214	NM_074653.6	NP_507054.1	V 9.56	sjj2_F44G3.2|V-14H24, mv_G_yc721E1, cenix:20-h2, sjj_F44G3.2	N.A.	N.A.	ok2973|Deletion|Inframe_deletion, ok2993|Deletion|Nonsense, tm12550|Deletion|Frameshift, gk257282|Substitution|Nonsense, gk257283|Substitution|Missense, gk257284|Substitution|Missense, gk257285|Substitution|Missense, gk384487|Substitution|Missense, gk427105|Substitution|Missense, gk502995|Substitution|Missense, gk538324|Substitution|Missense, gk543993|Substitution|Missense, gk731807|Substitution|…	actl-1|Physical, csr-1|Physical, sec-6|Physical, unc-119|Physical, wago-1|Physical	IL socket cell, intestine, OL socket cell	coelomocyte, germ line, intestine, OLL, PVD	N.A.	1-cell embryo Ce, 1-day post-L4 adult hermaphrodite Ce, 10-days post-L4 adult hermaphrodite Ce, 2-days post-L4 adult hermaphrodite Ce, 20-days post-L4 adult hermaphrodite Ce, 3-days post-L4 adult hermaphrodite Ce, 3-fold embryo Ce, 4-days post-L4 adult hermaphrodite Ce, 5-days post-L4 adult hermaphrodite Ce, 6-days post-L4 adult hermaphrodite Ce, 7-10 days post-L4 adult hermaphrodite Ce, adult Ce…	N.A.	HGNC:1996|OrthoInspector;EnsEMBL-Compara;OMA;Hieranoid;PhylomeDB;Inparanoid;Panther;OrthoFinder;TreeFam, HGNC:1995|OMA;TreeFam;EnsEMBL-Compara	"arginine kinase activity", "ATP binding", "ATP metabolic process", "catalytic activity", "creatine kinase activity", "determination of adult lifespan", "hydrogen peroxide metabolic process", "kinase activity", "nucleotide binding", "phosphocreatine biosynthetic process", "phosphorylation", "transferase activity", "transferase activity, transferring phosphorus-containing groups"	N.A.	Predicted to enable kinase activity. Involved in ATP metabolic process and hydrogen peroxide metabolic process. Acts upstream of or within with a positive effect on determination of adult lifespan. Expressed in IL socket cell and OL socket cell. Is an ortholog of human CKMT2 (creatine kinase, mitochondrial 2).	Enriched in germ line, coelomocyte, intestine, PVD and OLL according to proteomic study, tiling array, RNA-seq and microarray. Affected by lin-35, rde-4, zfp-1, clk-1, cyc-1, fer-1, lin-15B, age-1, nhr-49, nhr-114, smg-2, smgl-1, smgl-2, nhr-8, pgrn-1, ahr-1, emr-1, lem-2, blmp-1, bar-1, prg-1, ubc-9, daf-2, glp-1, skn-1, daf-16, ham-3, rsks-1, cox-5B, jmjd-3.1, dop-1, hyl-2, hsf-1, rbr-2, mir-60…	WBPaper00026952|pmid16314527, WBPaper00038491|pmid21647448, WBPaper00055090|pmid30120140
WBGene00001388	WBGene00001388	far-4	Caenorhabditis elegans	protein_coding_gene	F15B9.2	CELE_F15B9.2	F15B9.2.1	N.A.	CE09407	CE09407|HMMPANTHER:PTHR31418:SF4|HMMPANTHER:PTHR31418|PFAM:PF05823|INTERPRO:IPR008632	Q19477	Q19477	TF316252	NM_073851.5	NP_506252.1	V 4.80 +/- 0.00	sjj_F15B9.2|V-8L23, cenix:78-e12, smd_F15B9.2, mv_F15B9.2	N.A.	N.A.	gk250752|Substitution|Nonsense, gk332719|Substitution|Missense, gk396006|Substitution|Missense, gk559344|Substitution|Missense, gk611951|Substitution|Missense	N.A.	N.A.	N.A.	L4 larva Ce	N.A.	N.A.	N.A.	"lipid binding"	far-4 encodes a fatty acid and retinol-binding protein, paralogous to FAR-3 and FAR-5 and distantly homologous to FAR proteins of parasitic nematodes\; FAR-4 binds lipids in vitro\; far-4 is transcribed at highest levels in the fourth larval stage, and is dispensable for viability and gross morphology in mass RNAi assays.	Predicted to enable lipid binding activity.	Affected by cyc-1, lin-35, nhr-114, ubc-9, elt-2, daf-2, dpy-21, mir-34, daf-12, daf-16, smg-1, dpy-7, alg-1, hmg-3, hmg-4, spt-16, eat-2, damt-1, atfs-1, nuo-6, ints-1, sek-1, aak-1, aak-2, sacy-1, nas-38, unc-30, nhr-49, dpy-10, osm-8, isp-1 and oga-1 according to microarray and RNA-seq. Affected by methylmercuric chloride, Mercuric Chloride, D-glucose, bisphenol A, Ag nanoparticles, Psoralens,…	WBPaper00005754|pmid12502713
WBGene00000703	WBGene00000703	col-129	Caenorhabditis elegans	protein_coding_gene	M18.1	CELE_M18.1	M18.1a.1, M18.1b.1	CEOP4606	CE06193, CE49975	CE06193|HMMPANTHER:PTHR24637:SF242|HMMPANTHER:PTHR24637|SMART:SM01088|PFAM:PF01484|PFAM:PF01391|INTERPRO:IPR002486|INTERPRO:IPR008160, CE49975|HMMPANTHER:PTHR24637|HMMPANTHER:PTHR24637:SF242	A0A061ADV7, Q21556	Q21556	N.A.	NM_001380478.1, NM_069896.8	NP_502297.1, NP_001368475.1	IV 5.70 +/- 0.00	sjj_M18.1, mv_M18.1, cenix:186-f7, sjj2_M18.1|IV-10D13	N.A.	N.A.	gk214005|Substitution|Missense, gk214006|Substitution|Missense, gk214007|Substitution|Nonsense, gk423021|Substitution|Missense, gk437075|Substitution|Missense, gk473735|Substitution|Missense, gk491602|Substitution|Missense, gk498990|Substitution|Missense, gk502773|Substitution|Missense, gk532852|Substitution|Missense, gk632250|Substitution|Missense, gk693061|Substitution|Missense, gk753141|Substi…	dys-1|Regulatory, let-756|Physical	hypodermis, intestine, seam cell	body wall musculature, dorsal nerve cord, FLP, germ line, head mesodermal cell, hypodermis, lateral nerve cord, nerve ring, pharynx, somatic neuron, tail neuron, ventral nerve cord, vulval muscle	adult Ce, larva Ce	1-day post-L4 adult hermaphrodite Ce, 2-days post-L4 adult hermaphrodite Ce, 3-days post-L4 adult hermaphrodite Ce, 4-cell embryo Ce, 4-days post-L4 adult hermaphrodite Ce, 5-days post-L4 adult hermaphrodite Ce, 6-days post-L4 adult hermaphrodite Ce, 7-10 days post-L4 adult hermaphrodite Ce, adult Ce, adult hermaphrodite Ce, all stages Ce, blastula embryo Ce, dauer larva Ce, L1 larva Ce, L2 larva…	pneumonia|By Orthology, lung disease|By Orthology, bacterial pneumonia|By Orthology, respiratory syncytial virus infectious disease|By Orthology, cystic fibrosis|By Orthology, bronchiolitis obliterans|By Orthology, asthma|By Orthology, interstitial lung disease|By Orthology, chronic obstructive pulmonary disease|By Orthology, lung non-small cell carcinoma|By Orthology, rhinitis|By Orthology, syst…	HGNC:10803|PhylomeDB;Inparanoid	"anatomical structure development", "protein binding", "structural constituent of cuticle"	N.A.	Predicted to be a structural constituent of cuticle. Human ortholog(s) of this gene implicated in several diseases, including cystic fibrosis\; lung disease (multiple)\; and nose disease (multiple). Is an ortholog of human SFTPD (surfactant protein D).	Enriched in ventral nerve cord, body wall musculature, vulval muscle, nerve ring, dorsal nerve cord, somatic neuron, tail neuron, lateral nerve cord, pharynx, hypodermis, FLP, germ line and head mesodermal cell according to Chronogram analysis, tiling array, microarray and RNA-seq. Affected by cid-1, age-1, wdr-23, rsr-2, blmp-1, prg-1, clk-1, tdp-1, daf-2, glp-1, tcer-1, npr-1, dop-1, hyl-2, rbr…	WBPaper00027610|pmid16672054, WBPaper00028474|pmid16962739, WBPaper00033244|pmid N.A., WBPaper00038491|pmid21647448, WBPaper00055090|pmid30120140, WBPaper00059205|pmid31972909
WBGene00000667	WBGene00000667	col-92	Caenorhabditis elegans	protein_coding_gene	W05B2.6	CELE_W05B2.6	W05B2.6.1	N.A.	CE20148	CE20148|HMMPANTHER:PTHR24637:SF266|HMMPANTHER:PTHR24637|SMART:SM01088|PFAM:PF01484|PFAM:PF01391|INTERPRO:IPR002486|INTERPRO:IPR008160	Q9XVG3	Q9XVG3	N.A.	NM_067007.7	NP_499408.1	III 5.81	sjj_W05B2.6|III-5H04, cenix:321-h7, TH:321H7, mv_W05B2.6	dumpy, exploded through vulva, extended life span, increased susceptibility to bacterial pathogens, larval arrest, larval lethal, locomotion variant, organism morphology variant, pathogen susceptibility increased	N.A.	N.A.	pid-2|Physical, pid-3|Physical	hypodermis	N.A.	N.A.	N.A.	N.A.	N.A.	"anatomical structure development", "integral component of membrane", "membrane", "structural constituent of cuticle"	N.A.	Predicted to be a structural constituent of cuticle. Predicted to be located in membrane. Predicted to be integral component of membrane. Expressed in hypodermis.	Affected by cid-1, age-1, daf-12, hpl-2, rsr-2, pgrn-1, emr-1, lem-2, ZK1236.1, clk-1, wrn-1, tdp-1, daf-2, glp-1, daf-16, tcer-1, npr-1, dop-1, hyl-2, rbr-2, mir-60, lmn-1, glh-4, glh-1, pgl-1, pgl-3, morc-1, alg-1, alg-2, emb-4, sma-2, sma-4, lin-22, mir-71, drh-3, spt-16, pry-1, fbf-2, fbf-1, pfd-6, nhl-2, pals-22, efa-6, ptl-1, rrf-3, ints-1, hsp-6, sek-1, aak-1, aak-2, kri-1, mpk-2, pid-3, s…	WBPaper00038491|pmid21647448, WBPaper00042974|pmid N.A., WBPaper00044013|pmid23918784, WBPaper00055090|pmid30120140, WBPaper00057312|pmid31440537
WBGene00000608	WBGene00000608	col-19	Caenorhabditis elegans	protein_coding_gene	ZK1193.1	col19, CELE_ZK1193.1	ZK1193.1.1	N.A.	CE05126	CE05126|HMMPANTHER:PTHR24637|HMMPANTHER:PTHR24637:SF352|SMART:SM01088|PFAM:PF01391|PFAM:PF01484|INTERPRO:IPR002486|INTERPRO:IPR008160	P18835	P18835	TF319043	NM_001038488.6	NP_001033577.1	X -19.91	sjj_ZK1193.1|X-1C01, mv_AAA27987, cenix:179-b12, mv_AAA62505, smd_col-19_2	breaks in alae, dauer constitutive, multiple alae	N.A.	gk269019|Substitution|Missense, gk545609|Substitution|Missense, gk581586|Substitution|Missense, gk582053|Substitution|Missense, gk588305|Substitution|Missense, gk596189|Substitution|Missense, gk623099|Substitution|Missense, gk647871|Substitution|Missense, gk657520|Substitution|Missense, gk687322|Substitution|Missense, gk698337|Substitution|Missense, gk736828|Substitution|Missense, gk791460|Substi…	adt-2|Regulatory, arf-1|Regulatory, arf-5|Regulatory, atg-3|Regulatory, B0207.6|Regulatory, bar-1|Regulatory, bcl-11|Regulatory, bli-1|Regulatory, bli-3|Regulatory, bli-5|Regulatory, C15C6.1|Regulatory, cdk-12|Regulatory, ceh-12|Regulatory, ceh-13|Regulatory, ceh-18|Regulatory, ceh-20|Regulatory, ceh-31|Regulatory, ceh-32|Regulatory, ceh-36|Regulatory, ceh-40|Regulatory, ceh-6|Regulatory, cogc-4|…	cuticle, hyp7 syncytium, hypodermis, male, seam cell, syncytium, vulva	body wall muscle cell, cephalic sheath cell, hypodermis	adult Ce, adult hermaphrodite Ce, dauer larva Ce, L4-adult molt Ce	1-cell embryo Ce, 1-day post-L4 adult hermaphrodite Ce, 2-days post-L4 adult hermaphrodite Ce, 3-days post-L4 adult hermaphrodite Ce, 4-cell embryo Ce, 4-days post-L4 adult hermaphrodite Ce, 5-days post-L4 adult hermaphrodite Ce, 7-10 days post-L4 adult hermaphrodite Ce, adult Ce, adult hermaphrodite Ce, all stages Ce, blastula embryo Ce, dauer larva Ce, embryo Ce, L1 larva Ce, L2 larva Ce, L2d l…	N.A.	N.A.	"alae of collagen and cuticulin-based cuticle extracellular matrix", "annuli extracellular matrix", "collagen and cuticulin-based cuticle development", "collagen and cuticulin-based cuticle extracellular matrix", "collagen trimer", "cuticle development involved in collagen and cuticulin-based cuticle molting cycle", "extracellular region", "structural constituent of collagen and cuticulin-based c…	col-19 encodes a member of the collagen superfamily containing collagen triple helix repeats (20 copies) that is required for normal structure of the alae\; expressed during the L2-to-dauer and L4-to-adult molts with strongest expression in adult animals.	A structural constituent of collagen and cuticulin-based cuticle. Involved in cuticle development involved in collagen and cuticulin-based cuticle molting cycle. Located in alae of collagen and cuticulin-based cuticle extracellular matrix and annuli extracellular matrix. Predicted to be part of collagen trimer. Expressed in cuticle\; hyp7 syncytium\; syncytium\; vulva\; and in male.	Enriched in body wall muscle cell, cephalic sheath cell and hypodermis according to tiling array. Affected by daf-12, age-1, wdr-23, rsr-2, pgrn-1, let-7, gld-1, blmp-1, prg-1, wdr-5.1, tdp-1, daf-2, aak-2, crtc-1, glh-4, glh-1, pgl-1, pgl-3, swsn-2.2, npr-1, rbr-2, mafr-1, lin-41, alg-1, alg-2, sma-2, mir-71, cox-5B, nuo-6, set-26, hmg-3, flr-4, thoc-5, eat-2, pfd-6, atfs-1, pals-22, efa-6, hda-…	WBPaper00000748|pmid2983191, WBPaper00001099|pmid3148742, WBPaper00001146|pmid2753356, WBPaper00001322|pmid1978527, WBPaper00001392|pmid N.A., WBPaper00001515|pmid1738051, WBPaper00001621|pmid1398138, WBPaper00001835|pmid8307321, WBPaper00001918|pmid8143939, WBPaper00001927|pmid8166670, WBPaper00002222|pmid7671811, WBPaper00002223|pmid7671813, WBPaper00003119|pmid9649524, WBPaper00005201|pmid1170…
WBGene00001387	WBGene00001387	far-3	Caenorhabditis elegans	protein_coding_gene	F15B9.1	CELE_F15B9.1	F15B9.1.1	N.A.	CE09406	CE09406|HMMPANTHER:PTHR31418|HMMPANTHER:PTHR31418:SF4|PFAM:PF05823|INTERPRO:IPR008632	Q19478	Q19478	TF316252	NM_073850.8	NP_506251.1	V 4.79 +/- 0.00	mv_F15B9.1, sjj_F15B9.1|V-8L21, cenix:55-g7	N.A.	N.A.	gk907590|Substitution|Missense, gk937565|Substitution|Missense	myrf-1|Physical, smo-1|Physical	hypodermis, intestine, male, vulva	AFD, ALM, cephalic sheath cell, dopaminergic neuron, hypodermis, intestine, male-specific anatomical entity, PLM	adult Ce, adult hermaphrodite Ce, embryo Ce, L1 larva Ce, L2 larva Ce, L3 larva Ce, L4 larva Ce, larva Ce	1-day post-L4 adult hermaphrodite Ce, 10-days post-L4 adult hermaphrodite Ce, 2-days post-L4 adult hermaphrodite Ce, 3-days post-L4 adult hermaphrodite Ce, 4-days post-L4 adult hermaphrodite Ce, 5-days post-L4 adult hermaphrodite Ce, 6-days post-L4 adult hermaphrodite Ce, 7-10 days post-L4 adult hermaphrodite Ce, 96-cell embryo Ce, adult Ce, adult hermaphrodite Ce, adult male Ce, all stages Ce, b…	N.A.	N.A.	"lipid binding"	N.A.	Predicted to enable lipid binding activity. Expressed in vulva and in male.	Enriched in cephalic sheath cell, dopaminergic neuron, hypodermis, ALM, PLM, AFD, male-specific anatomical entity and intestine according to tiling array, microarray and RNA-seq. Affected by daf-12, daf-2, cyc-1, ung-1, ets-4, sam-10, lin-35, oatr-1, daf-16, nhr-8, pgrn-1, let-7, gld-1, lem-2, emr-1, blmp-1, prg-1, fbf-1, puf-8, gld-2, clk-1, wrn-1, tdp-1, glp-1, swsn-2.2, rsks-1, npr-1, jmjd-1.2…	WBPaper00005356|pmid12124626, WBPaper00005754|pmid12502713, WBPaper00026629|pmid15987632, WBPaper00028789|pmid17096597, WBPaper00032031|pmid18636113
WBGene00000698	WBGene00000698	col-124	Caenorhabditis elegans	protein_coding_gene	C24F3.6	CELE_C24F3.6	C24F3.6.1	N.A.	CE18523	CE18523|HMMPANTHER:PTHR24637|HMMPANTHER:PTHR24637:SF296|SMART:SM01088|PFAM:PF01484|INTERPRO:IPR002486	Q9NAR3	Q9NAR3	N.A.	NM_069466.6	NP_501867.1	IV 4.56	cenix:39-e12, mv_C24F3.4	N.A.	N.A.	gk210418|Substitution|Missense, gk210419|Substitution|Missense, gk210420|Substitution|Missense, gk210421|Substitution|Missense, gk478033|Substitution|Missense, gk486360|Substitution|Missense, gk497185|Substitution|Missense, gk534237|Substitution|Missense, gk638750|Substitution|Missense, gk651890|Substitution|Missense, gk794162|Substitution|Missense, gk885932|Substitution|Missense	pid-2|Physical	N.A.	AVK, germ line, Z1, Z4	N.A.	1-cell embryo Ce, 1-day post-L4 adult hermaphrodite Ce, 2-days post-L4 adult hermaphrodite Ce, 3-days post-L4 adult hermaphrodite Ce, 4-days post-L4 adult hermaphrodite Ce, 5-days post-L4 adult hermaphrodite Ce, 6-days post-L4 adult hermaphrodite Ce, 7-10 days post-L4 adult hermaphrodite Ce, adult Ce, adult hermaphrodite Ce, all stages Ce, blastula embryo Ce, dauer larva Ce, embryo Ce, L1 larva C…	N.A.	N.A.	"integral component of membrane", "membrane", "structural constituent of cuticle"	N.A.	Predicted to be a structural constituent of cuticle. Predicted to be located in membrane. Predicted to be integral component of membrane.	Enriched in germ line, Z4, Z1 and AVK according to RNA-seq. Affected by cid-1, age-1, daf-12, wdr-23, let-7, gld-1, tatn-1, blmp-1, prg-1, tdp-1, daf-2, glh-4, glh-1, pgl-1, pgl-3, daf-16, mir-60, lin-28, skn-1, dpy-21, mafr-1, glp-1, lin-41, hrde-1, alg-1, alg-2, emb-4, sma-2, sma-4, lin-22, mir-71, cox-5B, nuo-6, set-26, flr-4, thoc-5, pfd-6, efa-6, ptl-1, rrf-3, hsp-6, mdt-15, sek-1, aak-1, aa…	WBPaper00025088|pmid15837805, WBPaper00038491|pmid21647448, WBPaper00055090|pmid30120140, WBPaper00059642|pmid32417234
WBGene00000669	WBGene00000669	col-94	Caenorhabditis elegans	protein_coding_gene	W05B2.1	CELE_W05B2.1	W05B2.1.1	N.A.	CE20144	CE20144|HMMPANTHER:PTHR24637|HMMPANTHER:PTHR24637:SF266|SMART:SM01088|PFAM:PF01484|PFAM:PF01391|INTERPRO:IPR002486|INTERPRO:IPR008160	Q9U349	Q9U349	N.A.	NM_001382994.2	NP_001370010.1	III 5.82 +/- 0.01	TH:321G7, TH:334G2, mv_W05B2.1, cenix:321-g7, sjj_W05B2.1|III-5F20, cenix:334-g2	dumpy, exploded through vulva, extended life span, increased susceptibility to bacterial pathogens, larval arrest, larval lethal, locomotion variant, organism morphology variant, pathogen susceptibility increased	N.A.	gk316330|Substitution|Missense	N.A.	N.A.	N.A.	N.A.	N.A.	N.A.	N.A.	"anatomical structure development", "integral component of membrane", "membrane", "structural constituent of cuticle"	N.A.	Predicted to be a structural constituent of cuticle. Predicted to be located in membrane. Predicted to be integral component of membrane.	Affected by cid-1, age-1, rsr-2, pgrn-1, emr-1, ZK1236.1, prg-1, clk-1, wrn-1, tdp-1, daf-2, glp-1, mdt-15, daf-16, tcer-1, jmjd-3.1, jmjd-1.2, dop-1, rbr-2, mir-60, chd-3, lmn-1, cox-5B, daf-12, glh-4, glh-1, pgl-1, pgl-3, hrde-1, morc-1, alg-1, alg-2, emb-4, sma-2, sma-4, lin-22, mir-71, nuo-6, cav-1, spt-16, flr-4, pry-1, fbf-2, fbf-1, nhl-2, pals-22, ints-1, hsp-6, sek-1, numr-1, numr-2, rsks…	WBPaper00025192|pmid15893731, WBPaper00028809|pmid17116281, WBPaper00035598|pmid20005871, WBPaper00038491|pmid21647448, WBPaper00055090|pmid30120140, WBPaper00057312|pmid31440537
WBGene00017756	WBGene00017756	F23F12.12	Caenorhabditis elegans	protein_coding_gene	F23F12.12	CELE_F23F12.12	F23F12.12.1	CEOP3855	CE29282	CE29282|PhosphoPep:F23F12.12	Q95QJ3	Q95QJ3	N.A.	NM_066035.6	NP_498436.1	III -1.123281	N.A.	N.A.	N.A.	gk176734|Substitution|Missense, gk840034|Substitution|Missense	N.A.	N.A.	AFD, ASER, somatic gonad precursor	N.A.	1-cell embryo Ce, 1-day post-L4 adult hermaphrodite Ce, 2-days post-L4 adult hermaphrodite Ce, 3-days post-L4 adult hermaphrodite Ce, 3-fold embryo Ce, 5-days post-L4 adult hermaphrodite Ce, 6-days post-L4 adult hermaphrodite Ce, 7-10 days post-L4 adult hermaphrodite Ce, 96-cell embryo Ce, adult Ce, adult hermaphrodite Ce, all stages Ce, blastula embryo Ce, dauer larva Ce, embryo Ce, L1 larva Ce,…	N.A.	N.A.	N.A.	N.A.	Enriched in AFD\; ASER\; and somatic gonad precursor based on RNA-seq studies. Is affected by several genes including daf-16\; daf-2\; and glp-1 based on microarray and RNA-seq studies. Is affected by twenty-five chemicals including hydrogen sulfide\; rotenone\; and Deoxyglucose based on microarray and RNA-seq studies. Is predicted to encode a protein with the following domain: Phosphorylation si…	Enriched in AFD, ASER and somatic gonad precursor according to RNA-seq. Affected by cyc-1, pgrn-1, csr-1, ubc-9, clk-1, ash-2, daf-2, glh-4, glh-1, pgl-1, pgl-3, glp-1, daf-16, npr-1, dop-1, hyl-2, rbr-2, let-418, skn-1, dpy-21, mir-34, daf-12, hrde-1, alg-1, alg-2, emb-4, adr-2, sma-2, lin-22, nuo-6, hpl-2, hmg-3, thoc-5, eat-2, pry-1, damt-1, atfs-1, nhl-2, hsp-6, sek-1, aak-1, aak-2, nmad-1, s…	N.A.
WBGene00001500	WBGene00001500	ftn-1	Caenorhabditis elegans	protein_coding_gene	C54F6.14	CELE_C54F6.14	C54F6.14.1	N.A.	CE48091	CE48091|HMMPANTHER:PTHR11431:SF84|HMMPANTHER:PTHR11431|PFSCAN:PS50905|PFAM:PF00210|SUPERFAMILY:SSF47240|INTERPRO:IPR001519|INTERPRO:IPR008331|INTERPRO:IPR009078|INTERPRO:IPR012347	O16453	O16453	N.A.	NM_072543.8	NP_504944.2	V 0.79 +/- 0.01	cenix:46-d2, sjj_C54F6.14|V-5B07, mv_C54F6.14	embryonic lethal, extended life span, iron homeostasis variant, life span phenotype, organism oxidative stress resistant, organism oxidative stress response hypersensitive	shortened life span	gk381561|Substitution|Missense, gk647818|Substitution|Missense, gk667832|Substitution|Missense, gk840669|Substitution|Missense, snx1368|Substitution|Missense, snx3216|Substitution|Missense, snx5075|Substitution|Missense	daf-16|Physical;Regulatory, daf-2|Genetic;Regulatory, ftn-2|Physical;Genetic, hlh-29|Genetic;Regulatory, ada-2|Regulatory, aha-1|Regulatory, ast-1|Regulatory, bath-40|Physical, blmp-1|Regulatory, cdc-14|Regulatory, ceh-18|Regulatory, ceh-57|Regulatory, ceh-60|Regulatory, cep-1|Regulatory, cey-4|Regulatory, dve-1|Regulatory, egl-9|Regulatory, ehn-3|Regulatory, elt-2|Regulatory, F44E2.7|Regulatory,…	intestine, pharyngeal-intestinal valve	ASER, dopaminergic neuron, head mesodermal cell, intestine	adult Ce, L1 larva Ce, L2 larva Ce, L3 larva Ce, L4 larva Ce, larva Ce	1-day post-L4 adult hermaphrodite Ce, 10-days post-L4 adult hermaphrodite Ce, 11-15 days post-L4 adult hermaphrodite Ce, 2-days post-L4 adult hermaphrodite Ce, 20-days post-L4 adult hermaphrodite Ce, 24-cell embryo Ce, 3-days post-L4 adult hermaphrodite Ce, 4-days post-L4 adult hermaphrodite Ce, 5-days post-L4 adult hermaphrodite Ce, 6-days post-L4 adult hermaphrodite Ce, 7-10 days post-L4 adult …	basal ganglia disease|By Orthology, COVID-19|By Orthology, neurodegeneration with brain iron accumulation 3|By Orthology, hemochromatosis type 5|By Orthology, hyperferritinemia-cataract syndrome|By Orthology	HGNC:3987|OrthoInspector;EnsEMBL-Compara;OMA;Hieranoid;PhylomeDB;Inparanoid;Panther;OrthoFinder, HGNC:3976|OrthoInspector;EnsEMBL-Compara;OMA;Hieranoid;PhylomeDB;Inparanoid;Panther;OrthoFinder, HGNC:3999|OrthoInspector;EnsEMBL-Compara;OMA;Hieranoid;PhylomeDB;Panther;OrthoFinder, HGNC:33525|OrthoFinder;PhylomeDB;Panther, HGNC:17345|OrthoInspector;EnsEMBL-Compara;OMA;Hieranoid;PhylomeDB;Inparanoid;…	"cellular iron ion homeostasis", "cytoplasm", "ferric iron binding", "ferrous iron binding", "ferroxidase activity", "identical protein binding", "intracellular sequestering of iron ion", "iron ion transport", "metal ion binding", "oxidoreductase activity", "protein binding"	ftn-1 encodes one of two C. elegans ferritin heavy chain homologs\; ftn-1 activity is essential for normal lifespan under iron stress conditions and, in addition, has been reported to be essential for embryogenesis\; an ftn-1::gfp reporter is expressed in the intestine at all stages of development and its expression, as well as that of ftn-1 mRNA, increases under iron stress conditions and in the…	Enables identical protein binding activity. Involved in cellular iron ion homeostasis. Predicted to be located in cytoplasm. Expressed in intestine and pharyngeal-intestinal valve. Human ortholog(s) of this gene implicated in several diseases, including COVID-19\; hemochromatosis type 5\; and hyperferritinemia-cataract syndrome. Is an ortholog of human FTH1 (ferritin heavy chain 1)\; FTHL17 (ferr…	Enriched in dopaminergic neuron, intestine, ASER and head mesodermal cell according to tiling array, RNA-seq, proteomic study and microarray. Affected by zfp-1, cyc-1, ung-1, lin-35, daf-16, wdr-23, smgl-1, eat-2, pgrn-1, tatn-1, bar-1, hlh-30, prg-1, clk-1, wrn-1, daf-2, glp-1, swsn-2.2, elt-2, npr-1, jmjd-3.1, hsf-1, rbr-2, mir-60, chd-3, let-418, mir-34, glh-4, glh-1, pgl-1, pgl-3, mir-35, hrd…	WBPaper00005703|pmid12438312, WBPaper00010069|pmid N.A., WBPaper00019127|pmid N.A., WBPaper00024456|pmid15327944, WBPaper00028919|pmid17175555, WBPaper00031227|pmid18024960, WBPaper00032078|pmid18677319, WBPaper00033133|pmid19418991, WBPaper00033213|pmid N.A., WBPaper00033814|pmid N.A., WBPaper00033895|pmid N.A., WBPaper00035663|pmid20096764, WBPaper00037489|pmid N.A., WBPaper00038491|pmid2164744…
WBGene00000597	WBGene00000597	col-8	Caenorhabditis elegans	protein_coding_gene	F11H8.3	col8, CELE_F11H8.3	F11H8.3.1	N.A.	CE51260	CE51260|HMMPANTHER:PTHR24637|HMMPANTHER:PTHR24637:SF272|SMART:SM01088|PFAM:PF01484|INTERPRO:IPR002486	P18833	P18833	TF319043	NM_001382906.2	NP_001370389.1	III -0.85 +/- 0.00	TH:304H11, cenix:304-h11, smd_F11H8.3, sjj_F11H8.3|III-3P09, mv_AAA27993	N.A.	N.A.	tm10251|Deletion|Frameshift, gk177671|Substitution|Missense, gk177672|Substitution|Missense, gk177674|Substitution|Missense, gk177675|Substitution|Missense, gk333729|Substitution|Missense, gk438007|Substitution|Missense, gk538116|Substitution|Missense, gk577668|Substitution|Missense, gk599254|Substitution|Missense, gk636186|Substitution|Missense, gk867308|Substitution|Missense	col-20|Physical, dlg-1|Physical, sacy-1|Physical, sip-1|Physical	N.A.	AVK, cephalic sheath cell, dopaminergic neuron, germ line	adult Ce	1-cell embryo Ce, 1-day post-L4 adult hermaphrodite Ce, 2-days post-L4 adult hermaphrodite Ce, 3-days post-L4 adult hermaphrodite Ce, 4-days post-L4 adult hermaphrodite Ce, 5-days post-L4 adult hermaphrodite Ce, 6-days post-L4 adult hermaphrodite Ce, 7-10 days post-L4 adult hermaphrodite Ce, 7-days post-L4 adult hermaphrodite Ce, 96-cell embryo Ce, adult Ce, adult hermaphrodite Ce, all stages Ce,…	N.A.	N.A.	"collagen trimer", "structural constituent of cuticle"	col-8 encodes a collagen, individually dispensable for viability and gross morphology, which is specifically expressed in dauers and adults but not in eggs or L4 larvae, like col-7, col-18, and col-19\; the amino- and carboxyl-terminal cysteine-rich regions of COL-8 are most closely related to those of COL-19, COL-35, and COL-39.	Predicted to be a structural constituent of cuticle. Predicted to be part of collagen trimer.	Enriched in cephalic sheath cell, dopaminergic neuron, germ line and AVK according to tiling array and RNA-seq. Affected by cid-1, sma-2, sma-4, lin-15B, age-1, wdr-23, eat-2, let-7, gld-1, lem-2, emr-1, blmp-1, prg-1, wdr-5.1, daf-2, glh-4, glh-1, pgl-1, pgl-3, swsn-2.2, npr-1, dop-1, chd-3, cox-5B, mir-34, mafr-1, glp-1, lin-41, hrde-1, vit-2, alg-1, alg-2, nlg-1, isp-1, nuo-6, set-9, set-26, h…	WBPaper00000748|pmid2983191, WBPaper00000751|pmid3979813, WBPaper00001099|pmid3148742, WBPaper00001146|pmid2753356, WBPaper00001322|pmid1978527, WBPaper00001392|pmid N.A., WBPaper00001515|pmid1738051, WBPaper00001835|pmid8307321, WBPaper00001918|pmid8143939, WBPaper00001922|pmid8139571, WBPaper00001927|pmid8166670, WBPaper00002006|pmid8041603, WBPaper00006387|pmid14755799, WBPaper00013735|pmid N.…
WBGene00000693	WBGene00000693	col-119	Caenorhabditis elegans	protein_coding_gene	C53B4.5	CELE_C53B4.5	C53B4.5.1	N.A.	CE03091	CE03091|HMMPANTHER:PTHR24637:SF278|HMMPANTHER:PTHR24637|SMART:SM01088|PFAM:PF01484|INTERPRO:IPR002486	Q18799	Q18799	N.A.	NM_069160.6	NP_501561.1	IV 4.00 +/- 0.00	mv_C53B4.4a, sjj_C53B4.5|IV-4H13, cenix:182-g10, mv_C53B4.4c, mv_C53B4.5	dauer constitutive, fat content increased	N.A.	gk208161|Substitution|Missense, gk386911|Substitution|Missense, gk467701|Substitution|Missense, gk508603|Substitution|Missense, gk540162|Substitution|Missense, gk552143|Substitution|Missense, gk619124|Substitution|Missense, gk809179|Substitution|Missense, gk872562|Substitution|Missense, gk922397|Substitution|Missense	cra-1|Physical, daf-4|Physical, gfi-3|Physical	N.A.	germ line	N.A.	1-cell embryo Ce, 1-day post-L4 adult hermaphrodite Ce, 2-days post-L4 adult hermaphrodite Ce, 3-days post-L4 adult hermaphrodite Ce, 4-days post-L4 adult hermaphrodite Ce, 5-days post-L4 adult hermaphrodite Ce, 6-days post-L4 adult hermaphrodite Ce, 7-10 days post-L4 adult hermaphrodite Ce, adult Ce, adult hermaphrodite Ce, all stages Ce, blastula embryo Ce, dauer larva Ce, embryo Ce, L1 larva C…	N.A.	N.A.	"integral component of membrane", "membrane", "structural constituent of cuticle"	N.A.	Predicted to be a structural constituent of cuticle. Predicted to be located in membrane. Predicted to be integral component of membrane.	Enriched in germ line according to RNA-seq. Affected by cid-1, aak-2, age-1, daf-12, eat-2, let-7, gld-1, prg-1, wdr-5.1, tdp-1, daf-2, daf-16, swsn-2.2, npr-1, dop-1, hsf-1, cox-5B, mafr-1, glp-1, lin-41, glh-4, glh-1, pgl-1, pgl-3, emb-4, sma-2, sma-4, nuo-6, set-26, hpl-2, hmg-3, flr-4, thoc-5, pfd-6, atfs-1, nhl-2, pals-22, efa-6, hsp-6, mdt-15, aak-1, spc-1, unc-70, mex-1, spn-4, skn-1, mrps…	WBPaper00025088|pmid15837805, WBPaper00038491|pmid21647448, WBPaper00055090|pmid30120140, WBPaper00056839|pmid31162948
WBGene00000715	WBGene00000715	col-142	Caenorhabditis elegans	protein_coding_gene	T15B7.4	CELE_T15B7.4	T15B7.4.1	N.A.	CE13654	CE13654|HMMPANTHER:PTHR24637|HMMPANTHER:PTHR24637:SF309|SMART:SM01088|PFAM:PF01484|INTERPRO:IPR002486	O17036	O17036	TF316783	NM_072335.8	NP_504736.1	V 0.31 +/- 0.00	sjj_T15B7.4|V-4P22, mv_T15B7.4, cenix:212-f5	dauer lifespan extended	N.A.	gk238113|Substitution|Missense, gk238114|Substitution|Missense, gk238115|Substitution|Missense, gk344192|Substitution|Missense, gk454488|Substitution|Missense, gk465380|Substitution|Missense, gk496128|Substitution|Missense, gk504948|Substitution|Missense, gk532320|Substitution|Missense, gk679769|Substitution|Missense, gk756990|Substitution|Missense, gk797728|Substitution|Missense, gk918561|Substi…	Y69H2.3|Physical	N.A.	cephalic sheath cell, hypodermis	N.A.	1-cell embryo Ce, 1-day post-L4 adult hermaphrodite Ce, 2-days post-L4 adult hermaphrodite Ce, 24-cell embryo Ce, 3-days post-L4 adult hermaphrodite Ce, 4-cell embryo Ce, 4-days post-L4 adult hermaphrodite Ce, 5-days post-L4 adult hermaphrodite Ce, 6-days post-L4 adult hermaphrodite Ce, 7-10 days post-L4 adult hermaphrodite Ce, adult Ce, adult hermaphrodite Ce, all stages Ce, blastula embryo Ce, …	N.A.	N.A.	"integral component of membrane", "membrane", "structural constituent of cuticle"	N.A.	Predicted to be a structural constituent of cuticle. Predicted to be located in membrane. Predicted to be integral component of membrane.	Enriched in cephalic sheath cell and hypodermis according to tiling array. Affected by clk-1, sma-2, sma-4, age-1, pgrn-1, let-7, gld-1, blmp-1, bar-1, wrn-1, daf-2, glp-1, tcer-1, npr-1, dop-1, hyl-2, rbr-2, mir-60, chd-3, cec-4, dpy-21, hlh-30, mir-34, lin-41, glh-4, glh-1, pgl-1, pgl-3, hrde-1, morc-1, alg-1, alg-2, emb-4, nrx-1, nlg-1, mir-71, cox-5B, dpy-7, isp-1, nuo-6, drh-3, hpl-2, hmg-3,…	WBPaper00038491|pmid21647448, WBPaper00055090|pmid30120140, WBPaper00055425|pmid30274988, WBPaper00057602|pmid N.A.
WBGene00001772	WBGene00001772	gst-24	Caenorhabditis elegans	protein_coding_gene	F37B1.1	CELE_F37B1.1	F37B1.1.1	N.A.	CE17789	CE17789|HMMPANTHER:PTHR11571|HMMPANTHER:PTHR11571:SF203|PFSCAN:PS50404|PFSCAN:PS50405|PFAM:PF14497|PFAM:PF02798|SUPERFAMILY:SSF47616|SUPERFAMILY:SSF52833|INTERPRO:IPR004045|INTERPRO:IPR004046|INTERPRO:IPR036249|INTERPRO:IPR036282	Q93694	Q93694	TF353041	NM_064458.6	NP_496859.1	II 18.71 +/- 0.01	mv_F37B1.1, sjj_F37B1.1|II-8F08, cenix:184-f5	enzyme activity reduced, organism electrophilic stress hypersensitive, transgene expression increased	N.A.	gk159942|Substitution|Missense, gk159943|Substitution|Missense, gk159944|Substitution|Missense, gk159946|Substitution|Missense, gk366317|Substitution|Missense, gk470766|Substitution|Missense, gk581859|Substitution|Missense, gk615452|Substitution|Missense, gk625876|Substitution|Missense, gk692376|Substitution|Missense, gk776381|Substitution|Missense	cdc-48.2|Genetic, ckb-2|Regulatory, hpo-9|Physical, npr-1|Regulatory	head, tail	ALA, ASER, ASH, body wall muscle cell, coelomocyte, DA neuron, DVA, GABAergic neuron, head mesodermal cell, hypodermis, I4 neuron, I5 neuron, intestine, PHA, PHB, retrovesicular ganglion, SAB, sensory neuron, VA neuron	N.A.	1-day post-L4 adult hermaphrodite Ce, 10-days post-L4 adult hermaphrodite Ce, 2-days post-L4 adult hermaphrodite Ce, 3-days post-L4 adult hermaphrodite Ce, 4-days post-L4 adult hermaphrodite Ce, 5-days post-L4 adult hermaphrodite Ce, 6-days post-L4 adult hermaphrodite Ce, 7-10 days post-L4 adult hermaphrodite Ce, adult Ce, adult hermaphrodite Ce, all stages Ce, blastula embryo Ce, dauer larva Ce,…	N.A.	HGNC:17890|PhylomeDB;OMA;Hieranoid	"glutathione metabolic process", "glutathione transferase activity", "innate immune response", "transferase activity"	N.A.	Predicted to enable glutathione transferase activity. Involved in innate immune response. Expressed in head and tail. Is an ortholog of human HPGDS (hematopoietic prostaglandin D synthase).	Enriched in body wall muscle cell, coelomocyte, GABAergic neuron, hypodermis, head mesodermal cell, sensory neuron, ALA, ASER, ASH, DVA, I4 neuron, PHA, PHB, I5 neuron, DA neuron, SAB, retrovesicular ganglion, intestine and VA neuron according to tiling array, RNA-seq and microarray. Affected by npr-1, alg-1, cyc-1, age-1, wdr-23, prp-8, rsr-2, smg-2, smgl-1, smgl-2, eat-2, let-7, gld-1, wdr-5.1,…	WBPaper00028883|pmid17157356, WBPaper00032196|pmid18801967, WBPaper00033133|pmid19418991, WBPaper00038491|pmid21647448, WBPaper00048470|pmid26291679, WBPaper00055090|pmid30120140, WBPaper00056842|pmid31159140
WBGene00018465	WBGene00018465	F45E1.4	Caenorhabditis elegans	protein_coding_gene	F45E1.4	CELE_F45E1.4	F45E1.4.1	N.A.	CE44899	CE44899|HMMPANTHER:PTHR43434:SF1|HMMPANTHER:PTHR43434|TIGRFAM:TIGR01549|PFAM:PF13419|SUPERFAMILY:SSF56784|INTERPRO:IPR006439|INTERPRO:IPR023198|INTERPRO:IPR023214|INTERPRO:IPR036412|INTERPRO:IPR041492|Active_site	D7SFJ0	D7SFJ0	TF321407	NM_076944.3	NP_509345.2	X -0.751878	N.A.	N.A.	N.A.	gk691580|Substitution|Missense, gk749556|Substitution|Missense	N.A.	N.A.	coelomocyte, excretory cell, hypodermis, intestine, somatic gonad precursor, ventral nerve cord	N.A.	1-day post-L4 adult hermaphrodite Ce, 2-days post-L4 adult hermaphrodite Ce, 3-days post-L4 adult hermaphrodite Ce, 4-days post-L4 adult hermaphrodite Ce, 6-days post-L4 adult hermaphrodite Ce, 7-10 days post-L4 adult hermaphrodite Ce, adult Ce, adult hermaphrodite Ce, adult male Ce, all stages Ce, blastula embryo Ce, dauer larva Ce, embryo Ce, L1 larva Ce, L2 larva Ce, L2d larva Ce, L3 larva Ce,…	N.A.	N.A.	"cytosol", "dephosphorylation", "DNA repair", "phosphoglycolate phosphatase activity"	N.A.	Predicted to enable phosphoglycolate phosphatase activity. Predicted to be involved in DNA repair and dephosphorylation. Predicted to be located in cytosol.	Enriched in coelomocyte, excretory cell, ventral nerve cord, hypodermis, somatic gonad precursor and intestine according to tiling array, RNA-seq and microarray. Affected by clk-1, cyc-1, hlh-30, daf-16, age-1, smgl-1, pgrn-1, tatn-1, ZK1236.1, ubc-9, wrn-1, daf-2, glp-1, ham-3, mir-34, daf-12, dpy-21, glh-4, glh-1, pgl-1, pgl-3, vit-2, emb-4, sma-2, sma-4, lin-22, ins-11, nuo-6, egl-9, eat-2, pr…	WBPaper00055090|pmid30120140
WBGene00008341	WBGene00008341	ttr-44	Caenorhabditis elegans	protein_coding_gene	C56A3.2	CELE_C56A3.2	C56A3.2a.1, C56A3.2b.1	N.A.	CE09030, CE45479	CE09030|HMMPANTHER:PTHR21700|HMMPANTHER:PTHR21700:SF118|PFAM:PF01060|INTERPRO:IPR001534|INTERPRO:IPR038479, CE45479|HMMPANTHER:PTHR21700|HMMPANTHER:PTHR21700:SF118|PFAM:PF01060|INTERPRO:IPR001534|INTERPRO:IPR038479	Q18878, E3W741	Q18878	TF315773	NM_001269585.3, NM_001380804.1	NP_001367269.1, NP_001256514.1	V 5.42 +/- 0.01	sjj_C56A3.2|V-8N10, smd_6C56A3.2, cenix:230-d8, mv_C56A3.2	N.A.	N.A.	gk431976|Substitution|Missense, gk606601|Substitution|Missense, gk629915|Substitution|Missense	N.A.	N.A.	ASER, head mesodermal cell, intestine, M3 neuron	N.A.	1-day post-L4 adult hermaphrodite Ce, 2-days post-L4 adult hermaphrodite Ce, 24-cell embryo Ce, 3-days post-L4 adult hermaphrodite Ce, 4-days post-L4 adult hermaphrodite Ce, 5-days post-L4 adult hermaphrodite Ce, 7-10 days post-L4 adult hermaphrodite Ce, 96-cell embryo Ce, adult Ce, adult hermaphrodite Ce, all stages Ce, blastula embryo Ce, dauer larva Ce, embryo Ce, L1 larva Ce, L2 larva Ce, L2d…	N.A.	N.A.	"cell surface", "extracellular region"	N.A.	Predicted to be located in cell surface and extracellular region.	Enriched in intestine, ASER, head mesodermal cell and M3 neuron according to tiling array and RNA-seq. Affected by clk-1, cyc-1, isp-1, lin-15B, hpl-2, smgl-1, daf-16, nhr-8, pgrn-1, emr-1, csr-1, gld-2, wrn-1, daf-2, glp-1, fshr-1, hpk-1, npr-1, hsf-1, rbr-2, chd-3, let-418, dpy-27, mir-34, dpy-21, glh-4, glh-1, pgl-1, pgl-3, mir-35, vit-2, emb-4, sma-2, sma-4, lin-22, mir-71, cox-5B, his-3, elt…	N.A.

## Sheet: up regulation
wbid	term	found
WBGene00001772	glutathione transferase activity GO:0004364	1
WBGene00013073	symporter activity GO:0015293	1
WBGene00009824	NAD binding GO:0051287	1
WBGene00001500	identical protein binding GO:0042802	1
WBGene00009824	identical protein binding GO:0042802	1
WBGene00009824	oxidoreductase activity acting on CH-OH group of donors GO:0016614	1
WBGene00000608	collagen trimer GO:0005581	1
WBGene00000597	collagen trimer GO:0005581	1
WBGene00000608	cuticle development GO:0042335	1
WBGene00000698	structural constituent of cuticle GO:0042302	1
WBGene00000703	structural constituent of cuticle GO:0042302	1
WBGene00000715	structural constituent of cuticle GO:0042302	1
WBGene00000667	structural constituent of cuticle GO:0042302	1
WBGene00000669	structural constituent of cuticle GO:0042302	1
WBGene00000608	structural constituent of cuticle GO:0042302	1
WBGene00000693	structural constituent of cuticle GO:0042302	1
WBGene00000597	structural constituent of cuticle GO:0042302	1
Gene Ontology Enrichment Analysis Results?
Term	Expected	Observed	Enrichment Fold Change	P value	Q value
structural constituent of cuticle?O:0042302	0.15	8	52	6.1e-14	1.9e-11
collagen trimer?O:0005581	0.05	2	40	1.8e-05	0.0027
identical protein binding?O:0042802	0.11	2	18	0.00021	0.022
NAD binding?O:0051287	0.03	1	34	0.00042	0.032
cuticle development?O:0042335	0.046	1	22	0.001	0.061
symporter activity?O:0015293	0.05	1	20	0.0012	0.061
glutathione transferase activity?O:0004364	0.051	1	20	0.0012	0.061
oxidoreductase activity acting on CH-OH group of donors?O:0016614	0.071	1	14	0.0024	0.091
Phenotype Enrichment Analysis Results?
Term	Expected	Observed	Enrichment Fold Change	P value	Q value
dauer constitutive?BPhenotype:0000012	0.068	2	29	4.7e-05	0.011
breaks in alae?BPhenotype:0000280	0.027	1	37	0.00034	0.041
fat content increased?BPhenotype:0001184	0.14	2	14	0.00041	0.041
enzyme activity variant?BPhenotype:0000727	0.035	1	29	0.00057	0.041
extended life span?BPhenotype:0000061	0.38	3	7.8	0.0006	0.041
organism oxidative stress response hypersensitive?BPhenotype:0001621	0.041	1	25	0.00077	0.041
organism oxidative stress resistant?BPhenotype:0001663	0.046	1	22	0.001	0.041
dumpy?BPhenotype:0000583	0.21	2	9.5	0.0013	0.041
exploded through vulva?BPhenotype:0000038	0.22	2	9.2	0.0014	0.041
larval physiology phenotype?BPhenotype:0001293	0.49	3	6.2	0.0014	0.041
