# Supplementary material for: Intestinal GPDH-1 regulates high glucose diet induced lifespan extension in aged worms
Source: PeerJ. 2023 Aug 30;11:e15845. doi: 10.7717/peerj.15845 (PMC10474827; doi:10.7717/peerj.15845)
Supplement: Supplemental Information 4 [file peerj-11-15845-s004.xlsx]

## Sheet: Fig.3A
hours	N2	N2 HGD5
2	1	1
2	1	1
2	1	1
2	1	1
2	1	1
2	1	1
2	1	1
2	1	1
2	1	1
2	1	1
2	1	1
2	1	1
2	1	1
2	1	1
2	1
2	1
2	1
4	1	1
4	1	1
4	1	1
4	1	1
4	1	1
4	1	1
4	1	1
4	1	1
4	1	1
4	1	1
4	1	1
4	1
4	1
4	1
4	1
4	1
4	1
6	1	1
6	1	1
6	1	1
6	1	1
6	1	1
6	1	1
6	1	1
6	1	1
6	1	1
6	1	1
6	1	1
6	1	1
6	1	1
6	1	1
6	1	1
6	1	1
6	1	1
6	1	1
6	1	1
6	1	1
6	1
6	1
6	1
6
6
8	1	1
8	1	1
8	1	1
8	1	1
8	1	1
8	1	1
8	1	1
8	1	1
8	1	1
8	1	1
8		1
8
8
8
8
8
8
8
8
8
10	1	1
10	1	1
10	1	1
10	1	1
10	1	1
10	1	1
10	1	1
10	1	1
10	1	1
10	1	1
10	1	1
10	1	1
10	1	1
10	1	1
10	1	1
10	1	1
10	1	1
12	1	1
12	1	1
12	1	1
12	1	1
12	1	1
12	1	1
12	1	1
12	1	1
12	1	1
12	1	1
12	1	1
12	1	1
12	1
12	1
12	1
12	1
12	1
14	1	1
14	1	1
14	1	1
14	1	1
14	1	1
14	1	1
14	1	1
14	1	1
14	1	1
14	1	1
14		1
14		1
14		1
14		1
14		1
14		1
14		1
14		1
16	1	1
16	1	1
16	1	1
16	1	1
16	1	1
16	1	1
16	1	1
16	1	1
16	1	1
16		1
16		1
18		1
18		1
18		1

## Sheet: fig.3c
hours	col-92	col-92+HGD5
2	1	1
2	1	1
2	1	1
2	1	1
2	1	1
2	1	1
2	1	1
2	1	1
2	1	1
2	1
2	1
2
2
2
2
2
2
2
2
4	1	1
4	1	1
4	1	1
4	1	1
4	1	1
4	1	1
4	1
4	1
4
4
4
4
4
4
4
6	1	1
6	1	1
6	1	1
6	1	1
6	1	1
6	1	1
6	1	1
6	1	1
6	1	1
6	1	1
6	1	1
6	1	1
6	1	1
6	1	1
6	1	1
6	1	1
6	1	1
6	1
6	1
6	1
6	1
6
6
0
0
0
0
0
0
0
0
0
8	1	1
8	1	1
8	1	1
8	1	1
8	1	1
8	1	1
8	1	1
8	1	1
8	1	1
8	1	1
8	1	1
8	1	1
8	1
8	1
8	1
8	1
8	1
8	1
10	1	1
10	1	1
10	1	1
10	1	1
10	1	1
10	1	1
10	1	1
10	1	1
10	1	1
10	1	1
10	1	1
10	1
10	1
10	1
10	1
10	1
10	1
10	1
10	1
10	1
10	1
10	1
12	1	1
12	1	1
12	1	1
12	1	1
12	1	1
12	1	1
12	1	1
12	1	1
12	1	1
12	1	1
12	1
12	1
12	1
12	1
12	1
12	1
12	1
12	1
12
12
12
12
12
12
12
12
12
14	1	1
14	1	1
14	1	1
14	1	1
14	1	1
14	1	1
14	1	1
14	1	1
14	1	1
14	1	1
14	1	1
14	1	1
14		1
14		1
14		1
14		1
14		1
14		1
14		1
14		1
14		1
14		1
16		1
16		1
16		1
16		1
16		1
16		1

## Sheet: fig.3e
hours	gpdh-1	gpdh-1+HGD5
2	1	1
2	1	1
2	1	1
2	1	1
2	1	1
2	1	1
2	1	1
2	1	1
2	1	1
2	1	1
2	1	1
2	1	1
2	1	1
2	1
2	1
2	1
2
4	1	1
4	1	1
4	1	1
4	1	1
4	1	1
4	1	1
4	1	1
4	1	1
4	1	1
4	1	1
4	1
4	1
4
4
4
4
4
6	1	1
6	1	1
6	1	1
6	1	1
6	1	1
6	1	1
6	1	1
6	1	1
6	1	1
6	1	1
6	1	1
6	1	1
6	1	1
6	1	1
6	1	1
6	1	1
6	1	1
6	1	1
6	1	1
6	1	1
6	1	1
6	1	1
6		1
6		1
6		1
8	1	1
8	1	1
8	1	1
8	1	1
8	1	1
8	1	1
8	1	1
8	1	1
8	1	1
8	1	1
8	1	1
8	1	1
8	1	1
8	1	1
8	1	1
8	1	1
8	1	1
8	1	1
8	1	1
8		1
10	1	1
10	1	1
10	1	1
10	1	1
10	1	1
10	1	1
10	1	1
10	1	1
10	1	1
10	1	1
10	1	1
10	1	1
10	1	1
10	1
10	1
10
10
12	1	1
12	1	1
12	1	1
12	1	1
12	1	1
12	1	1
12	1	1
12	1	1
12	1	1
12	1	1
12	1
12	1
12	1
12	1
12	1
12
12
14	1	1
14	1	1
14	1	1
14	1	1
14	1	1
14	1	1
14	1	1
14	1	1
